# Supplementary material
Source: Royal Society of Chemistry journal article supplement (doi:10.1039/d6dt00462h)
Supplement: d6dt00462h2.pdf [file d6dt00462h2.pdf]

## Mechanistic and Electronic Structure Insights into Formate Formation in Uranium and Related Actinide Complexes

Ali A Khairbek<sup>1</sup>, Maha I. Al-Zaben<sup>2</sup>, Abdullah Yahya Abdullah Alzahrani<sup>3</sup>, Ralph Puchta<sup>4</sup> and Renjith Thomas<sup>5,6</sup>

<sup>1</sup> Centre of Molecular Medicine and Diagnostics (COMManD), Saveetha Dental College and Hospitals, Saveetha Institute of Medical and Technical Sciences, Saveetha University, Chennai 600 077, India

<sup>2</sup> Department of Chemistry, College of Science, King Saud University, P.O. Box 2455, Riyadh 11451, Saudi Arabia

<sup>3</sup> Faculty of Science and Arts, Department of Chemistry, King Khalid University, Mohail Asser, Saudi Arabia

<sup>4</sup> Inorganic Chemistry, Department of Chemistry and Pharmacy, University of Erlangen-Nuremberg, Erlangen, Germany

<sup>5</sup> Department of Chemistry, St Berchmans College (Autonomous), Mahatma Gandhi University, Changanassery, Kerala, India-686101.

<sup>6</sup> Centre for Theoretical and Computational Chemistry, St Berchmans College (Autonomous), Changanassery, Kerala, India-686101.

Corresponding Author: **Ali A Khairbek (MRSC, MACS)** [alikhairbek@gmail.com](mailto:alikhairbek@gmail.com)

Corresponding Author: **Renjith Thomas (FRSC, MACS)** [renjith@sbccollege.ac.in](mailto:renjith@sbccollege.ac.in)

**Table S1. Comparison of spin multiplicities and corresponding electronic energies (in atomic units) for selected actinide complexes. The lowest-energy state for each metal is identified as the ground state, which is used in all reported calculations.**

| Metal | Charge | Multiplicity | Energy (a.u.) | $\langle S^2 \rangle$ | Ground State |
|-------|--------|--------------|---------------|-----------------------|--------------|
| Th    | +1     | 1            | -864.244831   | —                     | Yes          |
| Th    | +1     | 3            | -864.110642   | 2.008                 | No           |
| Np    | +1     | 2            | -970.256176   | 1.688                 | No           |
| Np    | +1     | 4            | -970.304564   | 3.755                 | Yes          |
| Pu    | +1     | 3            | -1009.310269  | 2.014                 | Yes          |
| Pu    | +1     | 1            | —             | —                     | Failed       |
| U     | +1     | 3            | -933.448572   | 2.010                 | Yes          |
| U     | +1     | 1            | —             | —                     | Failed       |

All calculations were performed at the same level of theory, and the reported  $\langle S^2 \rangle$  values indicate minimal spin contamination for the selected ground states.

**Table S2.  $G_{\text{corr}}$  in the gas phase (in Hartree) of Uranium and Related Actinide Complexes.**

| $G_o$ | Formic   | I               | II       | TSI      |
|-------|----------|-----------------|----------|----------|
| U F   | 0.010291 | -0.011124       | 0.018243 | 0.014485 |
| U Cl  | 0.010291 | -0.015009       | 0.014296 | 0.011664 |
| U Br  | 0.010291 | -0.01902        | 0.012995 | 0.008817 |
| Th F  | 0.010291 | -0.010453       | 0.016287 | 0.013632 |
| Np F  | 0.010291 | -0.010414       | 0.017548 | 0.013757 |
| Pu F  | 0.010291 | -0.008994       | 0.017317 | 0.014982 |
| $G_o$ | III      | CH <sub>2</sub> | IV       | V        |

|                      |             |              |            |            |
|----------------------|-------------|--------------|------------|------------|
| U F                  | 0.017072    | 0.008022     | -0.006866  | 0.02382    |
| U Cl                 | 0.012268    | 0.008022     | -0.012774  | 0.018417   |
| U Br                 | 0.010043    | 0.008022     | -0.017124  | 0.015297   |
| Th F                 | 0.014699    | 0.008022     | -0.007715  | 0.0228     |
| Np F                 | 0.015265    | 0.008022     | -0.009062  | 0.022272   |
| Pu F                 | 0.014745    | 0.008022     | -0.007495  | 0.023938   |
| <b>G<sub>o</sub></b> | <b>TSII</b> | <b>VI</b>    | <b>H-X</b> | <b>VII</b> |
| U F                  | 0.019491    | 0.021484     | -0.006892  | 0.011662   |
| U Cl                 | 0.012295    | 0.015582     | -0.011009  | 0.01395    |
| U Br                 | 0.008813    | 0.011382     | -0.012855  | 0.009006   |
| Th F                 | 0.019386    | 0.019124     | -0.006892  | 0.011784   |
| Np F                 | 0.020769    | 0.020067     | -0.006892  | 0.014867   |
| Pu F                 | 0.020272    | 0.02232      | -0.006892  | 0.011353   |
| <b>G<sub>o</sub></b> | <b>VIII</b> | <b>TSIII</b> | <b>IX</b>  | <b>X</b>   |
| U F                  | 0.043564    | 0.037388     | 0.040013   | 0.030286   |
| U Cl                 | 0.040305    | 0.034498     | 0.036365   | 0.030286   |
| U Br                 | 0.038537    | 0.032622     | 0.034253   | 0.030286   |
| Th F                 | 0.042636    | 0.037954     | 0.03857    | 0.03114    |
| Np F                 | 0.043341    | 0.039521     | 0.037706   | 0.030739   |
| Pu F                 | 0.043928    | 0.040305     | 0.040378   | 0.031617   |

**Table S3. ( $E_o$ ) in the gas phase (in Hartree) of Uranium and Related Actinide Complexes.**

|                      |                 |                       |                 |                 |
|----------------------|-----------------|-----------------------|-----------------|-----------------|
| <b>E<sub>o</sub></b> | <b>Formic</b>   | <b>I</b>              | <b>II</b>       | <b>TSI</b>      |
| U F                  | -189.597667400  | -743.764088177        | -933.448571621  | -933.440760627  |
| U Cl                 | -189.597667400  | -1463.732365090       | -1653.423772330 | -1653.414138650 |
| U Br                 | -189.597667400  | -5650.826681130       | -5840.521036110 | -5840.509846470 |
| Th F                 | -189.597667400  | -674.557764122        | -864.244831506  | -864.236537980  |
| Np F                 | -189.597667400  | -780.618739943        | -970.304564218  | -970.291686182  |
| Pu F                 | -189.597667400  | -819.626453201        | -1009.310269250 | -1009.299232700 |
| <b>E<sub>o</sub></b> | <b>III</b>      | <b>CH<sub>2</sub></b> | <b>IV</b>       | <b>V</b>        |
| U F                  | -933.489100568  | -77.253598598         | -856.184946129  | -1045.870338000 |
| U Cl                 | -1653.449966570 | -77.253598598         | -1576.132447890 | -1765.822757240 |
| U Br                 | -5840.545039220 | -77.253598598         | -5763.222895240 | -5952.919201430 |
| Th F                 | -864.275304960  | -77.253598598         | -786.972681711  | -976.659073784  |
| Np F                 | -970.333185272  | -77.253598598         | -893.024795238  | -1082.714058970 |
| Pu F                 | -1009.343193540 | -77.253598598         | -932.033699333  | -1121.722284970 |
| <b>E<sub>o</sub></b> | <b>TSII</b>     | <b>VI</b>             | <b>H-X</b>      | <b>VII</b>      |
| U F                  | -1045.823047440 | -1045.843466610       | -100.364712310  | -945.428725987  |
| U Cl                 | -1765.797524850 | -1765.814906510       | -460.374172589  | -1305.406448710 |
| U Br                 | -5952.892289060 | -5952.911987640       | -2553.921558420 | -3398.953411000 |
| Th F                 | -976.622048893  | -976.639624358        | -100.364712310  | -876.226419047  |
| Np F                 | -1082.677320640 | -1082.695528220       | -100.364712310  | -982.278518732  |
| Pu F                 | -1121.690825780 | -1121.705510840       | -100.364712310  | -1021.292146960 |
| <b>E<sub>o</sub></b> | <b>VIII</b>     | <b>TSIII</b>          | <b>IX</b>       | <b>X</b>        |
| U F                  | -1135.110806650 | -1135.065336290       | -1135.082343920 | -1034.674537840 |
| U Cl                 | -1495.089943680 | -1495.059502680       | -1495.078074650 | -1034.674537840 |
| U Br                 | -3588.637309400 | -3588.606289540       | -3588.628333500 | -1034.674537840 |
| Th F                 | -1065.902553380 | -1065.871939200       | -1065.889311020 | -965.480183891  |
| Np F                 | -1171.967598710 | -1171.934097590       | -1171.948910670 | -1071.516401280 |
| Pu F                 | -1210.974700920 | -1210.944276390       | -1210.959079930 | -1110.551972880 |

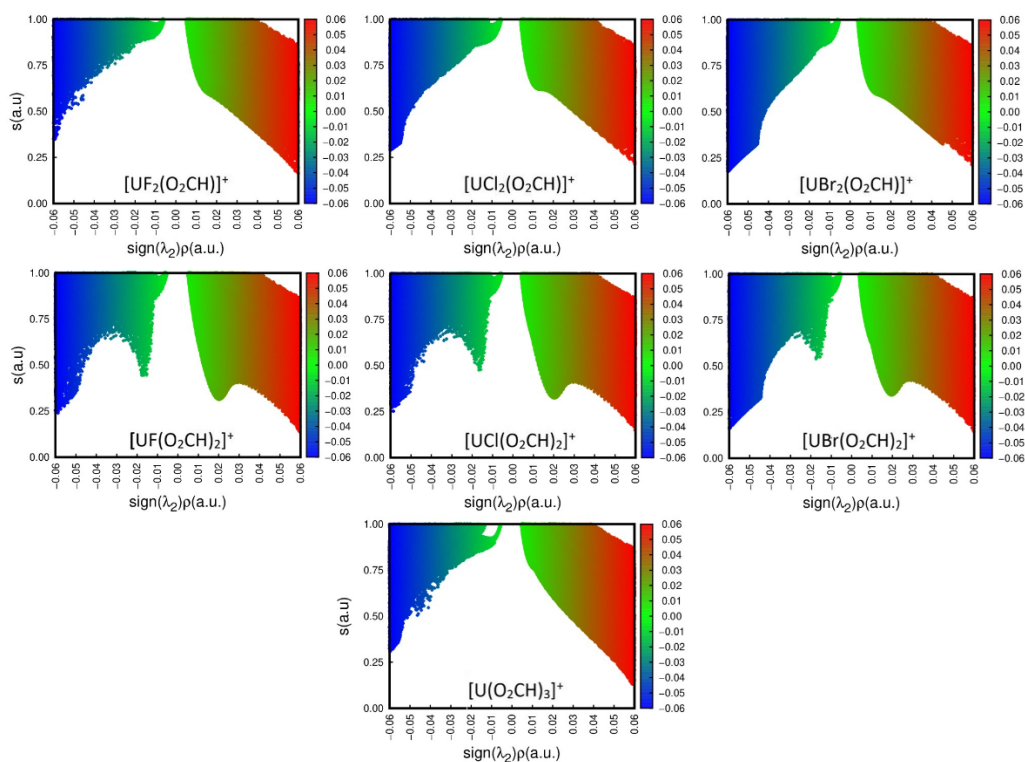

Fig. S1 RDG plots of uranium–halogen systems (F, Cl, Br) Formate Complexes.

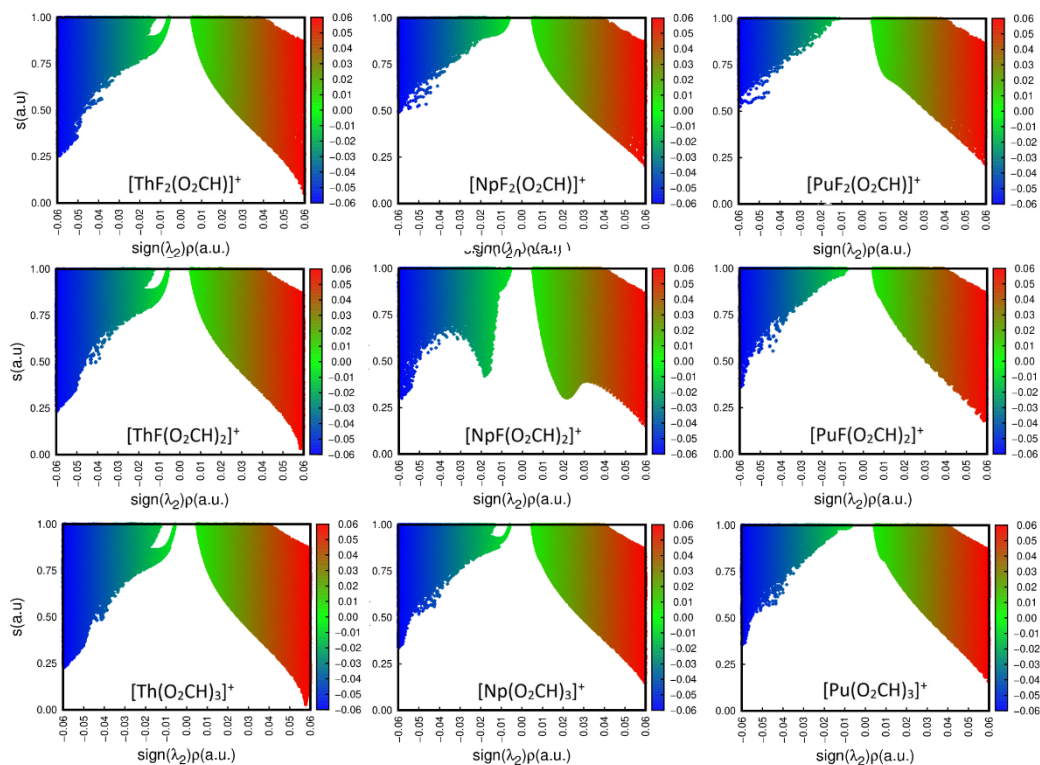

Fig. S2 RDG plots of actinide-substituted systems (Th, Np, and Pu) Formate Complexes.

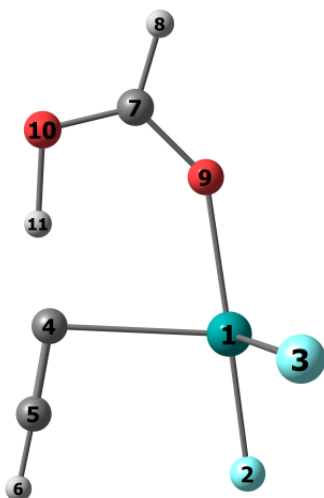

|            |             |             |             |
|------------|-------------|-------------|-------------|
| Atom 1(U): | 1.40751938  | Atom 7(C):  | 0.48271703  |
| Atom 2(F): | -0.12470745 | Atom 8(H):  | 0.03791703  |
| Atom 3(F): | -0.37239903 | Atom 9(O):  | -0.23551503 |
| Atom 4(C): | -0.74602541 | Atom 10(O): | 0.00717219  |
| Atom 5(C): | 0.05970390  | Atom 11(H): | 0.17069472  |
| Atom 6(H): | 0.31292266  |             |             |

Fig .S1. Atomic dipole-corrected Hirshfeld (ADCH) charge distributions for the transition states (TSI) in the U-F system.

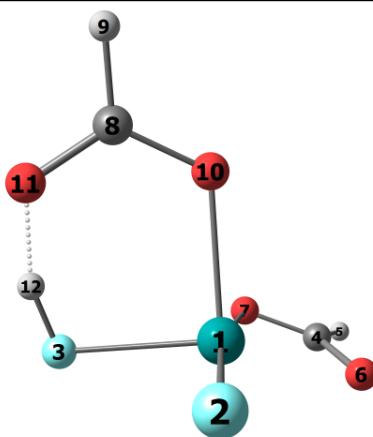

|            |             |             |             |
|------------|-------------|-------------|-------------|
| Atom 1(U): | 1.17348114  | Atom 7(O):  | -0.28598542 |
| Atom 2(F): | -0.10371503 | Atom 8(C):  | 0.32024194  |
| Atom 3(F): | -0.26795028 | Atom 9(H):  | 0.18972290  |
| Atom 4(C): | 0.30897093  | Atom 10(O): | -0.40555452 |
| Atom 5(H): | 0.24448632  | Atom 11(O): | -0.33329232 |
| Atom 6(O): | -0.25029533 | Atom 12(H): | 0.40988967  |

Fig .S2. Atomic dipole-corrected Hirshfeld (ADCH) charge distributions for the transition states (TSII) in the U-F system.

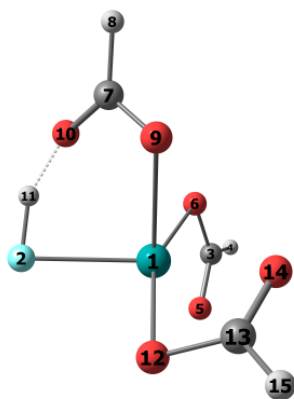

|            |             |             |             |
|------------|-------------|-------------|-------------|
| Atom 1(U): | 0.98828788  | Atom 9(O):  | -0.34596689 |
| Atom 2(F): | -0.21263080 | Atom 10(O): | -0.32078860 |
| Atom 3(C): | 0.31037460  | Atom 11(H): | 0.33640952  |
| Atom 4(H): | 0.22416628  | Atom 12(O): | -0.20724525 |
| Atom 5(O): | -0.23683555 | Atom 13(C): | 0.28130892  |
| Atom 6(O): | -0.29159498 | Atom 14(O): | -0.25758228 |
| Atom 7(C): | 0.33451553  | Atom 15(H): | 0.21383424  |
| Atom 8(H): | 0.18374738  |             |             |

Fig .S3. Atomic dipole-corrected Hirshfeld (ADCH) charge distributions for the transition states (TSIII) in the U–F system.

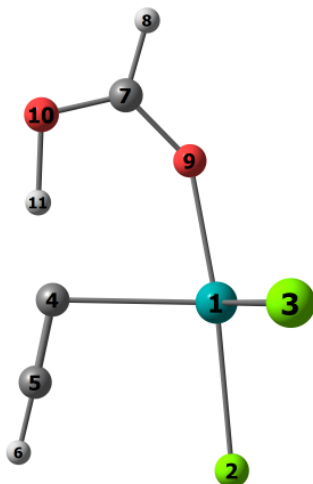

|             |             |             |             |
|-------------|-------------|-------------|-------------|
| Atom 1(U):  | 1.13382298  | Atom 7(C):  | 0.28580754  |
| Atom 2(Cl): | -0.05302328 | Atom 8(H):  | 0.15377827  |
| Atom 3(Cl): | -0.27960723 | Atom 9(O):  | -0.11045185 |
| Atom 4(C):  | -0.42859383 | Atom 10(O): | 0.01188350  |
| Atom 5(C):  | -0.69474815 | Atom 11(H): | 0.23905872  |
| Atom 6(H):  | 0.74207333  |             |             |

Fig .S4. Atomic dipole-corrected Hirshfeld (ADCH) charge distributions for the transition states (TSI) in the U–Cl system.

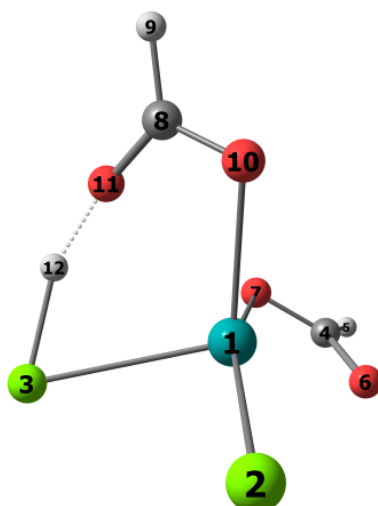

|             |             |             |             |
|-------------|-------------|-------------|-------------|
| Atom 1(U):  | 0.72053956  | Atom 7(O):  | -0.19870574 |
| Atom 2(Cl): | -0.01614838 | Atom 8(C):  | 0.43172345  |
| Atom 3(Cl): | -0.06446700 | Atom 9(H):  | 0.15439812  |
| Atom 4(C):  | 0.29052299  | Atom 10(O): | -0.30051591 |
| Atom 5(H):  | 0.20502590  | Atom 11(O): | -0.32954548 |
| Atom 6(O):  | -0.14546385 | Atom 12(H): | 0.25263632  |

Fig .S5. Atomic dipole-corrected Hirshfeld (ADCH) charge distributions for the transition states (TSII) in the U–Cl system.

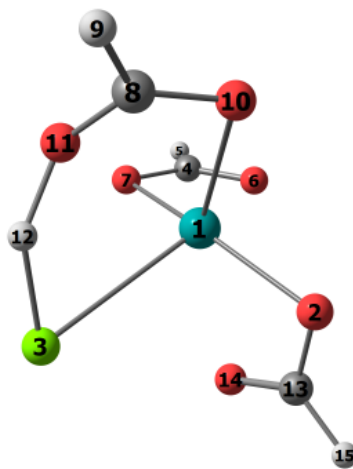

|             |             |             |             |
|-------------|-------------|-------------|-------------|
| Atom 1(U):  | 1.03399815  | Atom 9(H):  | 0.21578555  |
| Atom 2(O):  | -0.50937258 | Atom 10(O): | -0.21315293 |
| Atom 3(Cl): | -0.05607538 | Atom 11(O): | -0.15449959 |
| Atom 4(C):  | 0.31987095  | Atom 12(H): | 0.06334375  |
| Atom 5(H):  | 0.23484121  | Atom 13(C): | 0.42388433  |
| Atom 6(O):  | -0.20125952 | Atom 14(O): | -0.53272293 |
| Atom 7(O):  | -0.28484167 | Atom 15(H): | 0.40332748  |
| Atom 8(C):  | 0.25687318  |             |             |

Fig .S6. Atomic dipole-corrected Hirshfeld (ADCH) charge distributions for the transition states (TSIII) in the U–Cl system.

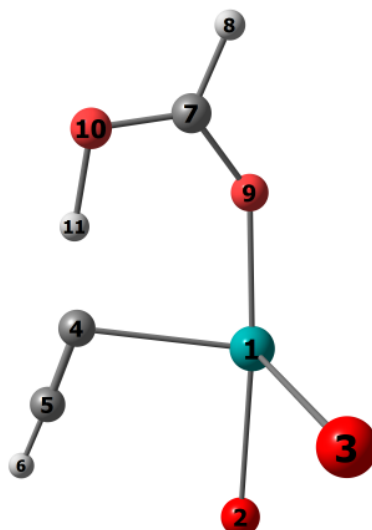

|             |             |             |             |
|-------------|-------------|-------------|-------------|
| Atom 1(U):  | 0.96947232  | Atom 7(C):  | 0.22507100  |
| Atom 2(Br): | 0.00959517  | Atom 8(H):  | 0.21481140  |
| Atom 3(Br): | -0.24580440 | Atom 9(O):  | -0.08994967 |
| Atom 4(C):  | 0.26934517  | Atom 10(O): | -0.04914772 |
| Atom 5(C):  | -1.38922040 | Atom 11(H): | 0.11182021  |
| Atom 6(H):  | 0.97400691  |             |             |

Fig .S7. Atomic dipole-corrected Hirshfeld (ADCH) charge distributions for the transition states (TSI) in the U–Br system.

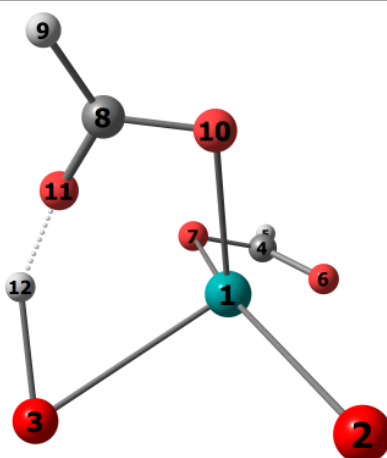

|             |             |             |             |
|-------------|-------------|-------------|-------------|
| Atom 1(U):  | 0.58135242  | Atom 7(O):  | -0.16138390 |
| Atom 2(Br): | 0.01527640  | Atom 8(C):  | 0.20880507  |
| Atom 3(Br): | -0.00065690 | Atom 9(H):  | 0.23221792  |
| Atom 4(C):  | 0.26434618  | Atom 10(O): | -0.18561140 |
| Atom 5(H):  | 0.21212075  | Atom 11(O): | -0.22740758 |
| Atom 6(O):  | -0.12571803 | Atom 12(H): | 0.18665907  |

Fig .S8. Atomic dipole-corrected Hirshfeld (ADCH) charge distributions for the transition states (TSII) in the U–Br system.

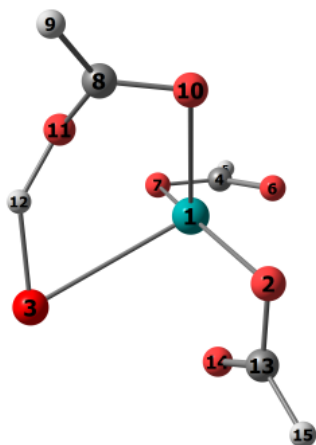

|             |             |             |             |
|-------------|-------------|-------------|-------------|
| Atom 1(U):  | 0.94811602  | Atom 8(C):  | 0.25643084  |
| Atom 2(O):  | -0.47134335 | Atom 9(H):  | 0.21224821  |
| Atom 3(Br): | 0.03765687  | Atom 10(O): | -0.20657048 |
| Atom 4(C):  | 0.30983178  | Atom 11(O): | -0.12730303 |
| Atom 5(H):  | 0.23740617  | Atom 12(H): | -0.00189856 |
| Atom 6(O):  | -0.18067489 | Atom 13(C): | 0.42118518  |
| Atom 7(O):  | -0.28657621 | Atom 14(O): | -0.52030493 |
|             |             | Atom 15(H): | 0.37179636  |

Fig .S9. Atomic dipole-corrected Hirshfeld (ADCH) charge distributions for the transition states (TSIII) in the U–Br system.

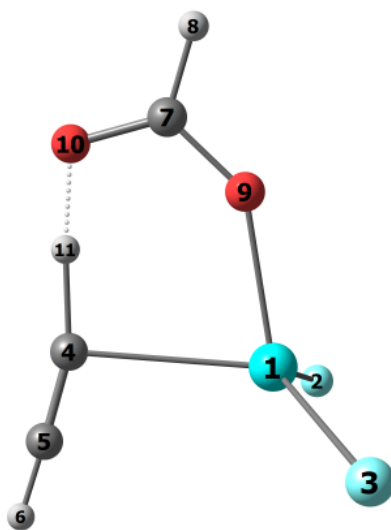

|             |             |             |             |
|-------------|-------------|-------------|-------------|
| Atom 1(Th): | 1.22132263  | Atom 7(C):  | 0.26022228  |
| Atom 2(F):  | -0.16496037 | Atom 8(H):  | 0.19590671  |
| Atom 3(F):  | -0.16490652 | Atom 9(O):  | -0.29343574 |
| Atom 4(C):  | -0.28418791 | Atom 10(O): | -0.18000661 |
| Atom 5(C):  | -0.11608184 | Atom 11(H): | 0.20724296  |
| Atom 6(H):  | 0.31888440  |             |             |

Fig .S10. Atomic dipole-corrected Hirshfeld (ADCH) charge distributions for the transition states (TSI) in the Th–F system.

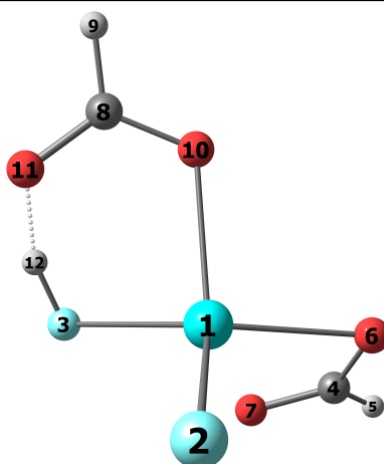

|             |             |             |             |
|-------------|-------------|-------------|-------------|
| Atom 1(Th): | 1.24660408  | Atom 7(O):  | -0.28799317 |
| Atom 2(F):  | -0.15466226 | Atom 8(C):  | 0.35765283  |
| Atom 3(F):  | -0.35281485 | Atom 9(H):  | 0.18009437  |
| Atom 4(C):  | 0.27268556  | Atom 10(O): | -0.32699210 |
| Atom 5(H):  | 0.22625751  | Atom 11(O): | -0.42797522 |
| Atom 6(O):  | -0.27137951 | Atom 12(H): | 0.53852276  |

Fig .S11. Atomic dipole-corrected Hirshfeld (ADCH) charge distributions for the transition states (TSII) in the Th–F system.

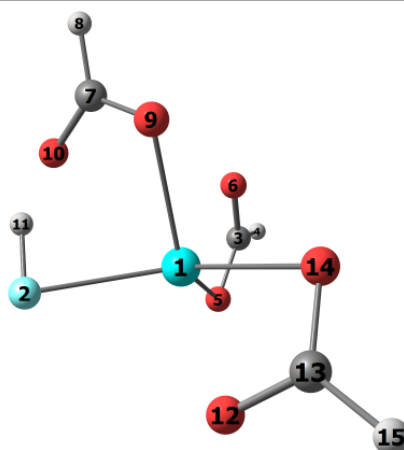

|             |             |             |             |
|-------------|-------------|-------------|-------------|
| Atom 1(Th): | 1.12270336  | Atom 8(H):  | 0.19329390  |
| Atom 2(F):  | -0.19698180 | Atom 9(O):  | -0.32923409 |
| Atom 3(C):  | 0.30690421  | Atom 10(O): | -0.34051246 |
| Atom 4(H):  | 0.22158416  | Atom 11(H): | 0.33490186  |
| Atom 5(O):  | -0.27249700 | Atom 12(O): | -0.24295876 |
| Atom 6(O):  | -0.32703411 | Atom 13(C): | 0.27509778  |
| Atom 7(C):  | 0.33207428  | Atom 14(O): | -0.29051536 |
|             |             | Atom 15(H): | 0.21317403  |

Fig .S12. Atomic dipole-corrected Hirshfeld (ADCH) charge distributions for the transition states (TSIII) in the Th–F system.

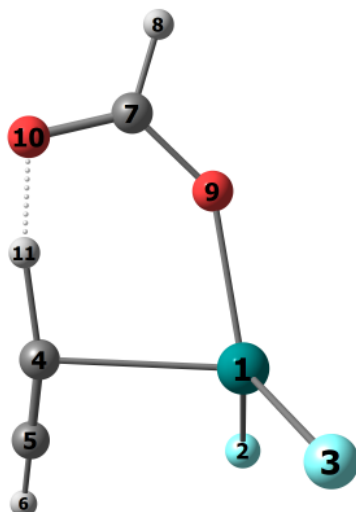

|             |             |             |             |
|-------------|-------------|-------------|-------------|
| Atom 1(Np): | 1.22356304  | Atom 7(C):  | 0.26296042  |
| Atom 2(F):  | -0.17272610 | Atom 8(H):  | 0.19839496  |
| Atom 3(F):  | -0.19214686 | Atom 9(O):  | -0.25085368 |
| Atom 4(C):  | -0.22096277 | Atom 10(O): | -0.16618412 |
| Atom 5(C):  | -0.25001221 | Atom 11(H): | 0.18124706  |
| Atom 6(H):  | 0.38672025  |             |             |

Fig .S13. Atomic dipole-corrected Hirshfeld (ADCH) charge distributions for the transition states (TSI) in the Np–F system.

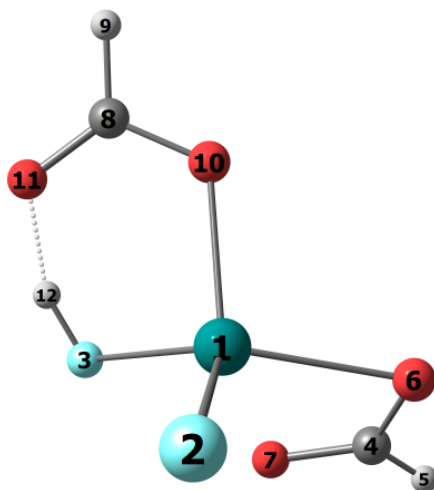

|             |             |             |             |
|-------------|-------------|-------------|-------------|
| Atom 1(Np): | 1.12688077  | Atom 7(O):  | -0.29612242 |
| Atom 2(F):  | -0.13488878 | Atom 8(C):  | 0.33249364  |
| Atom 3(F):  | -0.30897784 | Atom 9(H):  | 0.18924143  |
| Atom 4(C):  | 0.34084013  | Atom 10(O): | -0.30104790 |
| Atom 5(H):  | 0.20712037  | Atom 11(O): | -0.36410544 |
| Atom 6(O):  | -0.27405581 | Atom 12(H): | 0.48262186  |

Fig .S14. Atomic dipole-corrected Hirshfeld (ADCH) charge distributions for the transition states (TSII) in the Np–F system.

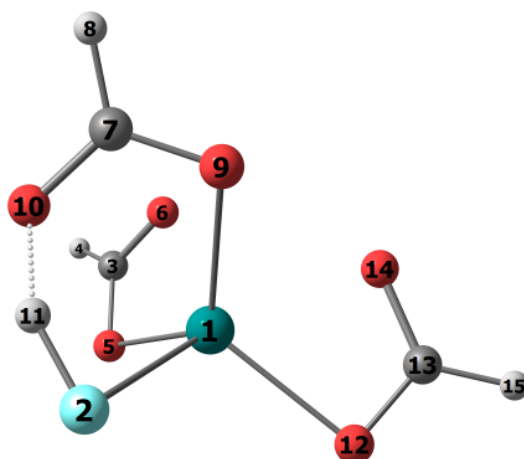

|             |             |             |             |
|-------------|-------------|-------------|-------------|
| Atom 1(Np): | 0.91416641  | Atom 9(O):  | -0.35395136 |
| Atom 2(F):  | -0.23131083 | Atom 10(O): | -0.39414751 |
| Atom 3(C):  | 0.23370221  | Atom 11(H): | 0.41635799  |
| Atom 4(H):  | 0.15280805  | Atom 12(O): | -0.18728835 |
| Atom 5(O):  | -0.15239514 | Atom 13(C): | 0.28311587  |
| Atom 6(O):  | -0.21453464 | Atom 14(O): | -0.24537174 |
| Atom 7(C):  | 0.40653291  | Atom 15(H): | 0.20504745  |
| Atom 8(H):  | 0.16726869  |             |             |

Fig .S15. Atomic dipole-corrected Hirshfeld (ADCH) charge distributions for the transition states (TSIII) in the Np–F system.

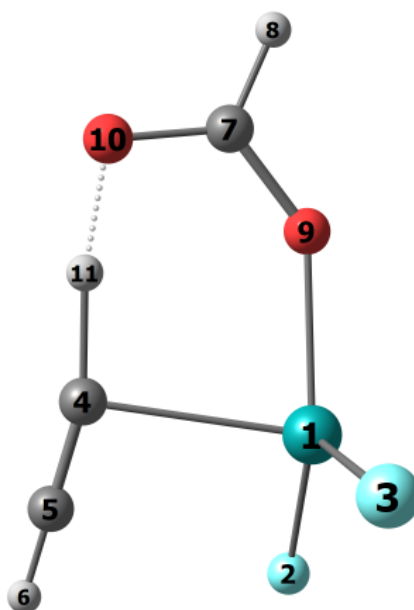

|             |             |             |             |
|-------------|-------------|-------------|-------------|
| Atom 1(Pu): | 1.30496539  | Atom 6(H):  | -0.07168759 |
| Atom 2(F):  | -0.17495941 | Atom 7(C):  | 0.30117009  |
| Atom 3(F):  | -0.26270641 | Atom 8(H):  | 0.15870024  |
| Atom 4(C):  | -0.49775096 | Atom 9(O):  | -0.25609998 |
| Atom 5(C):  | 0.54917054  | Atom 10(O): | -0.11411743 |
|             |             | Atom 11(H): | 0.06331552  |

Fig .S16. Atomic dipole-corrected Hirshfeld (ADCH) charge distributions for the transition states (TSI) in the Pu–F system.

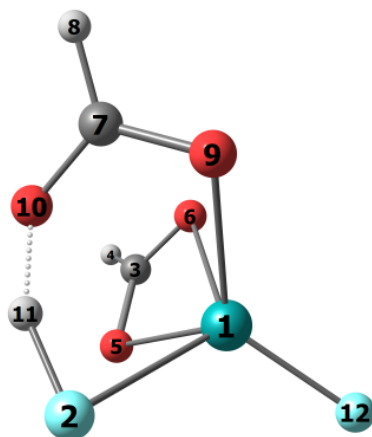

|             |             |             |             |
|-------------|-------------|-------------|-------------|
| Atom 1(Pu): | 1.36160045  | Atom 7(C):  | 0.42868218  |
| Atom 2(F):  | -0.26118475 | Atom 8(H):  | 0.16663645  |
| Atom 3(C):  | 0.17772570  | Atom 9(O):  | -0.29556464 |
| Atom 4(H):  | 0.45531028  | Atom 10(O): | -0.36381566 |
| Atom 5(O):  | -0.46801166 | Atom 11(H): | 0.37843076  |
| Atom 6(O):  | -0.47694260 | Atom 12(F): | -0.10286650 |

Fig .S17. Atomic dipole-corrected Hirshfeld (ADCH) charge distributions for the transition states (TSII) in the Pu–F system.

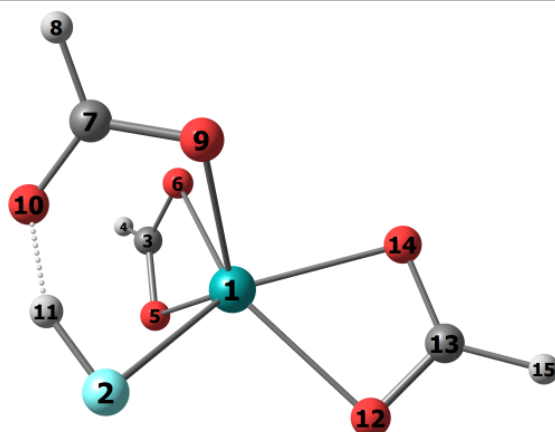

|             |             |             |             |
|-------------|-------------|-------------|-------------|
| Atom 1(Pu): | 0.95276179  | Atom 9(O):  | -0.34924331 |
| Atom 2(F):  | -0.25410529 | Atom 10(O): | -0.40239037 |
| Atom 3(C):  | -0.12287947 | Atom 11(H): | 0.40396815  |
| Atom 4(H):  | 0.29808358  | Atom 12(O): | -0.22469445 |
| Atom 5(O):  | -0.06815794 | Atom 13(C): | 0.31301481  |
| Atom 6(O):  | -0.10060834 | Atom 14(O): | -0.25056359 |
| Atom 7(C):  | 0.46298660  | Atom 15(H): | 0.19615034  |
| Atom 8(H):  | 0.14567749  |             |             |

Fig .S18. Atomic dipole-corrected Hirshfeld (ADCH) charge distributions for the transition states (TSIII) in the Pu–F system.

## Input

%nprocshared=30

%mem=60GB

# opt Freq integral=grid=ultrafine MN12l gen pseudo=read SCF=(XQC,MaxCycle=1000)  
Guess=Mix Nosymm

**Basis set H, C, O, N**

**Web Link:** <http://www.basissetexchange.org/basis/cc-pvdz-dk/format/gaussian94/?version=0&elements=1,6,7,8,9>

**API Link:** <http://www.basissetexchange.org/api/basis/cc-pvdz-dk/format/gaussian94/?version=0&elements=1,6,7,8,9>

**Basis set: Th, U, Np, Pu**

**Web Link:** <http://www.basissetexchange.org/basis/cc-pvdz-dk3/format/gaussian94/?version=1&elements=90,92,93,94>

**API Link:** <http://www.basissetexchange.org/api/basis/cc-pvdz-dk3/format/gaussian94/?version=1&elements=90,92,93,94>

**ECP: Th, U, Np, Pu**

**Web**

**Link:** <http://www.basissetexchange.org/basis/stuttgart%20rsc%201997%20ecp/format/gaussian94/?version=0&elements=90,92,93,94>

**API**

**Link:** <http://www.basissetexchange.org/api/basis/stuttgart%20rsc%201997%20ecp/format/gaussian94/?version=0&elements=90,92,93,94>

### Reference:

pritchard2019a

Pritchard, Benjamin P., Altarawy, Doaa, Didier, Brett, Gibsom, Tara D., Windus, Theresa L.

A New Basis Set Exchange: An Open, Up-to-date Resource for the Molecular Sciences Community

J. Chem. Inf. Model. 59, 4814-4820 (2019)

10.1021/acs.jcim.9b00725

feller1996a

Feller, David

The role of databases in support of computational chemistry calculations

J. Comput. Chem. 17, 1571-1586 (1996)

10.1002/(SICI)1096-987X(199610)17:13<1571::AID-JCC9>3.0.CO;2-P

schuchardt2007a

Schuchardt, Karen L., Didier, Brett T., Elsethagen, Todd, Sun, Lisong, Gurumoorthi, Vidhya, Chase, Jared, Li, Jun, Windus, Theresa L.

Basis Set Exchange: A Community Database for Computational Sciences

J. Chem. Inf. Model. 47, 1045-1052 (2007)

10.1021/ci600510j

|    |              |                        |              |
|----|--------------|------------------------|--------------|
|    |              | <b>Formic</b>          |              |
| 6  | 2.061242000  | -0.052983000           | 0.000000000  |
| 1  | 0.948407000  | -0.132824000           | 0.000000000  |
| 8  | 2.654418000  | 0.976750000            | 0.000000000  |
| 8  | 2.682392000  | -1.236275000           | 0.000000000  |
| 1  | 2.033187000  | -1.950460000           | 0.000000000  |
|    |              | <b>CH<sub>2</sub></b>  |              |
| 6  | 0.000000000  | 0.000000000            | 0.603019000  |
| 1  | 0.000000000  | 0.000000000            | 1.674168000  |
| 6  | 0.000000000  | 0.000000000            | -0.603019000 |
| 1  | 0.000000000  | 0.000000000            | -1.674168000 |
|    |              | <b>HF</b>              |              |
| 9  | -1.376819000 | 1.488618000            | -0.360884000 |
| 1  | -0.976233000 | 2.055324000            | 0.242664000  |
|    |              | <b>HCl</b>             |              |
| 17 | -1.319418000 | -0.002023000           | -0.451420000 |
| 1  | -0.515815000 | 0.503285000            | 0.422563000  |
|    |              | <b>HBr</b>             |              |
| 35 | -1.305314000 | 0.000575000            | -0.384399000 |
| 1  | -1.249185000 | 0.593471000            | 0.890642000  |
|    |              | <b>I (UF) System</b>   |              |
| 92 | 0.165827000  | 0.740683000            | 0.641037000  |
| 9  | -1.419091000 | 1.329318000            | -0.326825000 |
| 9  | 1.768400000  | 1.330869000            | -0.296004000 |
| 6  | 0.175791000  | -2.560335000           | -0.079102000 |
| 1  | 0.179102000  | -3.615786000           | -0.304739000 |
| 6  | 0.172120000  | -1.357616000           | 0.179251000  |
|    |              | <b>II (UF) System</b>  |              |
| 92 | 0.019860000  | 0.790650000            | 0.328724000  |
| 9  | -1.860249000 | 1.183384000            | -0.121904000 |
| 9  | 1.445937000  | 1.803948000            | -0.583053000 |
| 6  | 0.487696000  | -2.485712000           | -0.530866000 |
| 1  | 0.635655000  | -3.518941000           | -0.797596000 |
| 6  | 0.319682000  | -1.307689000           | -0.223715000 |
| 6  | 0.360511000  | 1.035956000            | 3.811878000  |
| 1  | 1.286866000  | 1.023257000            | 4.412896000  |
| 8  | 0.398426000  | 0.967722000            | 2.588089000  |
| 8  | -0.773334000 | 1.122496000            | 4.412593000  |
| 1  | -0.697451000 | 1.170510000            | 5.379290000  |
|    |              | <b>TSI (UF) System</b> |              |
| 92 | -0.382395000 | 0.943431000            | 0.615629000  |
| 9  | -0.822632000 | 0.466961000            | -1.225231000 |
| 9  | 1.494034000  | 1.402701000            | 0.248689000  |
| 6  | -0.028446000 | -1.221740000           | 1.562771000  |
| 6  | -0.247929000 | -1.892813000           | 0.553992000  |
| 1  | -0.434102000 | -2.501899000           | -0.319363000 |
| 6  | 0.388693000  | 0.921352000            | 3.747638000  |

|   |              |              |             |
|---|--------------|--------------|-------------|
| 1 | 0.535666000  | 1.610975000  | 4.593448000 |
| 8 | -0.029867000 | 1.436841000  | 2.635079000 |
| 8 | 0.607475000  | -0.279630000 | 3.877392000 |
| 1 | 0.332592000  | -0.815190000 | 2.828335000 |

**III (UF) System**

|    |             |              |              |
|----|-------------|--------------|--------------|
| 6  | 1.708027000 | 0.020801000  | -0.283586000 |
| 1  | 0.637133000 | -0.205771000 | -0.416876000 |
| 8  | 2.119785000 | 1.209122000  | -0.148203000 |
| 8  | 2.575817000 | -0.904733000 | -0.260784000 |
| 92 | 4.281640000 | 0.537677000  | 0.034795000  |
| 9  | 4.597171000 | 0.676644000  | -1.868764000 |
| 9  | 4.027387000 | 0.555787000  | 1.953382000  |
| 6  | 4.254268000 | 3.251930000  | 0.761498000  |
| 1  | 4.213295000 | 3.276062000  | 1.840269000  |
| 6  | 4.279577000 | 3.285597000  | -0.451328000 |
| 1  | 4.277336000 | 3.384722000  | -1.526928000 |

**IV (UF) System**

|    |             |              |              |
|----|-------------|--------------|--------------|
| 6  | 1.330549000 | -0.085941000 | -0.265322000 |
| 1  | 0.233014000 | -0.145402000 | -0.351731000 |
| 8  | 1.916229000 | 1.014830000  | -0.026008000 |
| 8  | 2.062298000 | -1.113535000 | -0.398570000 |
| 92 | 3.934457000 | 0.056913000  | -0.049431000 |
| 9  | 4.110639000 | 0.533926000  | -1.902182000 |
| 9  | 3.812171000 | -0.424543000 | 1.805515000  |

**V (UF) System**

|    |             |              |              |
|----|-------------|--------------|--------------|
| 6  | 1.687377000 | 0.546299000  | 0.097815000  |
| 1  | 0.639707000 | 0.884941000  | 0.166094000  |
| 8  | 2.645999000 | 1.333587000  | 0.353368000  |
| 8  | 1.964764000 | -0.638739000 | -0.238517000 |
| 92 | 4.217154000 | -0.310923000 | -0.051671000 |
| 9  | 4.372470000 | 0.094667000  | -1.939158000 |
| 9  | 4.076365000 | -0.699582000 | 1.842915000  |
| 6  | 5.091408000 | 2.739435000  | 0.912849000  |
| 1  | 4.050264000 | 3.070936000  | 1.081338000  |
| 8  | 5.339352000 | 1.601719000  | 0.525596000  |
| 8  | 6.059329000 | 3.559466000  | 1.123022000  |
| 1  | 5.756686000 | 4.429446000  | 1.425785000  |

**TSII (UF) System**

|    |             |              |              |
|----|-------------|--------------|--------------|
| 92 | 3.890958000 | 0.492800000  | -1.048328000 |
| 9  | 3.053850000 | -0.236476000 | -2.636247000 |
| 9  | 3.174770000 | 2.705398000  | -0.973708000 |
| 6  | 6.038770000 | 0.130841000  | 0.435711000  |
| 1  | 6.879820000 | 0.032847000  | 1.141518000  |
| 8  | 5.914206000 | -0.578145000 | -0.584610000 |
| 8  | 5.121619000 | 1.016327000  | 0.653941000  |
| 6  | 1.288518000 | 0.511453000  | 0.324043000  |

|   |             |              |              |
|---|-------------|--------------|--------------|
| 1 | 0.427647000 | 0.067319000  | 0.848979000  |
| 8 | 2.398636000 | -0.153046000 | 0.327589000  |
| 8 | 1.185278000 | 1.593914000  | -0.258211000 |
| 1 | 2.239799000 | 2.431357000  | -0.661405000 |

**VI (UF) System**

|    |             |              |              |
|----|-------------|--------------|--------------|
| 6  | 1.869840000 | 0.447196000  | 0.422169000  |
| 1  | 1.074079000 | 0.374138000  | 1.181812000  |
| 6  | 5.552138000 | 0.163634000  | 0.551325000  |
| 1  | 6.193598000 | 0.057640000  | 1.441550000  |
| 8  | 2.056587000 | 1.513335000  | -0.238444000 |
| 8  | 2.631433000 | -0.531226000 | 0.173858000  |
| 8  | 5.483249000 | -0.692403000 | -0.347717000 |
| 8  | 4.828295000 | 1.231141000  | 0.416775000  |
| 92 | 3.816239000 | 0.592233000  | -1.392730000 |
| 9  | 3.012066000 | -0.189996000 | -2.972715000 |
| 9  | 3.587431000 | 3.038659000  | -1.607416000 |
| 1  | 2.942449000 | 3.381697000  | -1.021940000 |

**VII (UF) System**

|    |             |              |              |
|----|-------------|--------------|--------------|
| 6  | 1.839368000 | 0.298633000  | 0.488470000  |
| 1  | 1.030861000 | 0.112910000  | 1.214292000  |
| 6  | 5.536261000 | 0.130346000  | 0.573593000  |
| 1  | 6.215960000 | -0.060426000 | 1.419976000  |
| 8  | 1.975354000 | 1.425892000  | -0.077844000 |
| 8  | 2.672146000 | -0.605211000 | 0.179863000  |
| 8  | 5.419648000 | -0.637097000 | -0.399317000 |
| 8  | 4.811259000 | 1.206647000  | 0.568199000  |
| 92 | 3.754651000 | 0.738696000  | -1.258315000 |
| 9  | 2.964766000 | -0.002786000 | -2.858196000 |

**VIII (UF) System**

|    |             |              |              |
|----|-------------|--------------|--------------|
| 6  | 1.647613000 | 0.543380000  | 0.134708000  |
| 1  | 0.966235000 | 0.974059000  | 0.887159000  |
| 6  | 5.199411000 | 1.010224000  | -0.180792000 |
| 1  | 5.900346000 | 1.616046000  | 0.417576000  |
| 8  | 2.330436000 | 1.309266000  | -0.626477000 |
| 8  | 1.777461000 | -0.696332000 | -0.008039000 |
| 8  | 4.584387000 | 0.034566000  | 0.332957000  |
| 8  | 4.990760000 | 1.268805000  | -1.402959000 |
| 92 | 3.440483000 | -0.435584000 | -1.591787000 |
| 9  | 4.284366000 | -2.054141000 | -2.283372000 |
| 6  | 3.124928000 | 2.226625000  | -3.386580000 |
| 1  | 3.471547000 | 2.803059000  | -2.508392000 |
| 8  | 3.048225000 | 1.001182000  | -3.356299000 |
| 8  | 2.798788000 | 2.854019000  | -4.460446000 |
| 1  | 2.901755000 | 3.814645000  | -4.380900000 |

**TSIII (UF) System**

|    |             |             |              |
|----|-------------|-------------|--------------|
| 92 | 3.883335000 | 0.378988000 | -1.146372000 |
|----|-------------|-------------|--------------|

|   |             |              |              |
|---|-------------|--------------|--------------|
| 9 | 2.925646000 | 2.392737000  | -1.623795000 |
| 6 | 5.899629000 | 0.336151000  | 0.573556000  |
| 1 | 6.666206000 | 0.259513000  | 1.362100000  |
| 8 | 6.176713000 | 0.466693000  | -0.637303000 |
| 8 | 4.648527000 | 0.296525000  | 0.893166000  |
| 6 | 1.502653000 | 0.483305000  | 0.382928000  |
| 1 | 0.746283000 | 0.242269000  | 1.147088000  |
| 8 | 1.886122000 | -0.398876000 | -0.433334000 |
| 8 | 2.017396000 | 1.640404000  | 0.368730000  |
| 1 | 2.354314000 | 2.225584000  | -0.714307000 |
| 8 | 3.570157000 | -0.259565000 | -3.185030000 |
| 6 | 3.467913000 | -1.527203000 | -2.918763000 |
| 8 | 3.649572000 | -1.876209000 | -1.740193000 |
| 1 | 3.225909000 | -2.230718000 | -3.731532000 |

**IX (UF) System**

|    |             |              |              |
|----|-------------|--------------|--------------|
| 6  | 1.330549000 | -0.085941000 | -0.265322000 |
| 1  | 0.233014000 | -0.145402000 | -0.351731000 |
| 8  | 1.916229000 | 1.014830000  | -0.026008000 |
| 8  | 2.062298000 | -1.113535000 | -0.398570000 |
| 92 | 3.934457000 | 0.056913000  | -0.049431000 |
| 9  | 4.110639000 | 0.533926000  | -1.902182000 |
| 9  | 3.812171000 | -0.424543000 | 1.805515000  |

**X (UF) System**

|    |             |              |              |
|----|-------------|--------------|--------------|
| 6  | 1.430958000 | 0.494440000  | 0.634723000  |
| 1  | 0.495737000 | 0.645357000  | 1.198500000  |
| 6  | 5.927296000 | 0.297481000  | 0.556349000  |
| 1  | 6.899409000 | 0.360621000  | 1.071715000  |
| 8  | 2.041734000 | 1.464056000  | 0.090491000  |
| 8  | 1.945574000 | -0.656920000 | 0.497588000  |
| 8  | 5.296228000 | -0.799232000 | 0.456949000  |
| 8  | 5.382718000 | 1.317966000  | 0.034348000  |
| 92 | 3.645450000 | 0.125075000  | -0.767923000 |
| 6  | 3.529190000 | -0.393622000 | -3.361609000 |
| 1  | 3.447582000 | -0.607536000 | -4.439502000 |
| 8  | 3.617336000 | 0.793985000  | -2.922132000 |
| 8  | 3.532252000 | -1.321790000 | -2.496075000 |

**I (UCI) System**

|    |              |              |              |
|----|--------------|--------------|--------------|
| 92 | 0.164701000  | 0.624050000  | 0.834886000  |
| 17 | -1.700050000 | 1.455408000  | -0.454121000 |
| 17 | 2.053049000  | 1.457614000  | -0.417625000 |
| 6  | 0.174935000  | -2.605730000 | -0.061465000 |
| 1  | 0.178291000  | -3.648740000 | -0.340523000 |
| 6  | 0.171224000  | -1.415469000 | 0.252466000  |

**II (UCI) System**

|    |             |             |             |
|----|-------------|-------------|-------------|
| 92 | 0.065807000 | 0.908387000 | 0.310425000 |
|----|-------------|-------------|-------------|

|    |              |              |              |
|----|--------------|--------------|--------------|
| 17 | -2.293770000 | 0.665000000  | 1.045894000  |
| 17 | 2.299011000  | 1.671527000  | -0.414544000 |
| 6  | 0.519489000  | -2.319916000 | -0.595185000 |
| 1  | 0.650211000  | -3.346646000 | -0.893927000 |
| 6  | 0.365794000  | -1.147700000 | -0.257057000 |
| 6  | 0.260070000  | 0.893508000  | 3.656253000  |
| 1  | 0.808647000  | 0.352421000  | 4.445777000  |
| 8  | 0.590124000  | 0.787516000  | 2.478496000  |
| 8  | -0.726655000 | 1.653154000  | 3.973912000  |
| 1  | -0.915130000 | 1.668329000  | 4.926293000  |

**TSI (UCI) System**

|    |              |              |              |
|----|--------------|--------------|--------------|
| 92 | -0.444852000 | 0.984445000  | 0.712549000  |
| 17 | -1.037406000 | 0.289949000  | -1.576313000 |
| 17 | 1.883587000  | 1.511453000  | 0.212857000  |
| 6  | -0.006004000 | -1.148687000 | 1.553496000  |
| 6  | -0.282602000 | -1.851831000 | 0.578876000  |
| 1  | -0.507216000 | -2.486304000 | -0.266727000 |
| 6  | 0.363963000  | 0.891151000  | 3.806855000  |
| 1  | 0.474214000  | 1.564268000  | 4.670845000  |
| 8  | -0.136405000 | 1.401204000  | 2.721023000  |
| 8  | 0.690734000  | -0.288467000 | 3.879826000  |
| 1  | 0.415077000  | -0.796191000 | 2.825091000  |

**III (UCI) System**

|    |             |              |              |
|----|-------------|--------------|--------------|
| 6  | 1.681574000 | -0.017012000 | -0.238038000 |
| 1  | 0.606932000 | -0.253606000 | -0.302748000 |
| 8  | 2.101070000 | 1.169218000  | -0.102509000 |
| 8  | 2.567210000 | -0.928034000 | -0.297371000 |
| 92 | 4.239068000 | 0.508852000  | -0.077443000 |
| 17 | 4.770784000 | 0.622541000  | -2.478320000 |
| 17 | 4.208393000 | 0.488157000  | 2.386393000  |
| 6  | 4.303723000 | 3.279793000  | 0.776031000  |
| 1  | 4.286058000 | 3.336210000  | 1.853097000  |
| 6  | 4.317875000 | 3.213232000  | -0.438071000 |
| 1  | 4.317332000 | 3.367067000  | -1.508773000 |

**IV (UCI) System**

|    |             |              |              |
|----|-------------|--------------|--------------|
| 6  | 1.261521000 | -0.088068000 | -0.277408000 |
| 1  | 0.165251000 | -0.144286000 | -0.373999000 |
| 8  | 1.858816000 | 0.989976000  | 0.030572000  |
| 8  | 2.008937000 | -1.098471000 | -0.467230000 |
| 92 | 3.834602000 | 0.040450000  | -0.052576000 |
| 17 | 4.308373000 | 0.643863000  | -2.375906000 |
| 17 | 3.961858000 | -0.507216000 | 2.328818000  |

**V (UCI) System**

|   |             |              |              |
|---|-------------|--------------|--------------|
| 6 | 1.466619000 | 0.689321000  | 0.046168000  |
| 1 | 0.414522000 | 1.018137000  | 0.060733000  |
| 8 | 2.418912000 | 1.484066000  | 0.308006000  |
| 8 | 1.776515000 | -0.508542000 | -0.235172000 |

|    |             |              |              |
|----|-------------|--------------|--------------|
| 92 | 3.979459000 | -0.162939000 | -0.004063000 |
| 17 | 4.972723000 | -0.202294000 | -2.265037000 |
| 17 | 4.674820000 | -1.290881000 | 2.079266000  |
| 6  | 5.002850000 | 2.858914000  | 0.844130000  |
| 1  | 4.019091000 | 3.359346000  | 0.913820000  |
| 8  | 5.080610000 | 1.666469000  | 0.539965000  |
| 8  | 6.074041000 | 3.514617000  | 1.078791000  |
| 1  | 5.916983000 | 4.444360000  | 1.310456000  |

**TSII (UCI) System**

|    |             |              |              |
|----|-------------|--------------|--------------|
| 92 | 3.812080000 | 0.504177000  | -1.090908000 |
| 17 | 3.267741000 | -0.412371000 | -3.289058000 |
| 17 | 3.114696000 | 3.048373000  | -1.559291000 |
| 6  | 5.817153000 | 0.211841000  | 0.580603000  |
| 1  | 6.612974000 | 0.182577000  | 1.343391000  |
| 8  | 5.866579000 | -0.422552000 | -0.492535000 |
| 8  | 4.762404000 | 0.936962000  | 0.784190000  |
| 6  | 1.477397000 | 0.382283000  | 0.456930000  |
| 1  | 0.635386000 | 0.147678000  | 1.127629000  |
| 8  | 2.039864000 | -0.522393000 | -0.213816000 |
| 8  | 1.915318000 | 1.574107000  | 0.410690000  |
| 1  | 2.292279000 | 2.383909000  | -0.488554000 |

**VI (UCI) System**

|    |             |              |              |
|----|-------------|--------------|--------------|
| 6  | 1.873047000 | 0.449199000  | 0.446350000  |
| 1  | 1.052926000 | 0.368968000  | 1.178729000  |
| 6  | 5.578465000 | 0.107008000  | 0.587076000  |
| 1  | 6.229358000 | -0.027241000 | 1.466455000  |
| 8  | 2.073823000 | 1.512644000  | -0.213201000 |
| 8  | 2.657443000 | -0.521809000 | 0.229303000  |
| 8  | 5.465963000 | -0.742514000 | -0.317509000 |
| 8  | 4.892214000 | 1.197238000  | 0.462836000  |
| 92 | 3.840678000 | 0.573471000  | -1.326770000 |
| 17 | 2.933780000 | -0.628992000 | -3.271126000 |
| 17 | 3.732392000 | 3.498989000  | -1.725037000 |
| 1  | 2.717315000 | 3.599086000  | -0.910579000 |

**VII (UCI) System**

|    |             |              |              |
|----|-------------|--------------|--------------|
| 6  | 1.841671000 | 0.312435000  | 0.501147000  |
| 1  | 1.011352000 | 0.089109000  | 1.190655000  |
| 6  | 5.562427000 | 0.132160000  | 0.619422000  |
| 1  | 6.243980000 | -0.104749000 | 1.452438000  |
| 8  | 1.993786000 | 1.466040000  | -0.006116000 |
| 8  | 2.690679000 | -0.570538000 | 0.174723000  |
| 8  | 5.440376000 | -0.582800000 | -0.393430000 |
| 8  | 4.839725000 | 1.207609000  | 0.668430000  |
| 92 | 3.784681000 | 0.827399000  | -1.173894000 |
| 17 | 2.811596000 | -0.169061000 | -3.182654000 |

**VIII (UCI) System**

|    |             |              |              |
|----|-------------|--------------|--------------|
| 6  | 1.634459000 | 0.555628000  | 0.155174000  |
| 1  | 0.943322000 | 0.964169000  | 0.910855000  |
| 6  | 5.189385000 | 1.062929000  | -0.158858000 |
| 1  | 5.896461000 | 1.664119000  | 0.436356000  |
| 8  | 2.294057000 | 1.337405000  | -0.607606000 |
| 8  | 1.800719000 | -0.681305000 | 0.008955000  |
| 8  | 4.566009000 | 0.092780000  | 0.356561000  |
| 8  | 4.976389000 | 1.320980000  | -1.381709000 |
| 92 | 3.437677000 | -0.384126000 | -1.565790000 |
| 17 | 4.359350000 | -2.502003000 | -2.479457000 |
| 6  | 3.129893000 | 2.261397000  | -3.378398000 |
| 1  | 3.509173000 | 2.853113000  | -2.524525000 |
| 8  | 3.027700000 | 1.038260000  | -3.310297000 |
| 8  | 2.789475000 | 2.862909000  | -4.460643000 |
| 1  | 2.912674000 | 3.823565000  | -4.414261000 |

**TSIII (UCI) System**

|    |             |              |              |
|----|-------------|--------------|--------------|
| 92 | 3.842735000 | -0.062615000 | -1.624405000 |
| 8  | 3.147104000 | -1.064139000 | -3.395560000 |
| 17 | 3.039026000 | 2.401820000  | -2.527002000 |
| 6  | 5.920985000 | -0.224480000 | -0.007451000 |
| 1  | 6.790525000 | -0.208588000 | 0.669725000  |
| 8  | 5.644847000 | -1.207063000 | -0.736768000 |
| 8  | 5.139076000 | 0.793320000  | -0.076847000 |
| 6  | 1.229435000 | 0.046054000  | -0.573057000 |
| 1  | 0.147541000 | 0.114761000  | -0.372844000 |
| 8  | 1.796201000 | -1.015469000 | -0.861345000 |
| 8  | 1.977157000 | 1.106129000  | -0.483672000 |
| 1  | 2.145271000 | 1.936795000  | -1.348830000 |
| 6  | 3.969034000 | -0.496493000 | -4.227566000 |
| 8  | 4.757961000 | 0.341155000  | -3.760183000 |
| 1  | 3.933956000 | -0.775426000 | -5.293219000 |

**IX (UCI) System**

|    |             |              |              |
|----|-------------|--------------|--------------|
| 6  | 1.449009000 | 0.434199000  | 0.586247000  |
| 1  | 0.505381000 | 0.458082000  | 1.156882000  |
| 6  | 6.033180000 | 0.178466000  | 0.657022000  |
| 1  | 6.943530000 | 0.025080000  | 1.259530000  |
| 8  | 1.943400000 | 1.475620000  | 0.073159000  |
| 8  | 2.085323000 | -0.651323000 | 0.418105000  |
| 8  | 5.012742000 | -0.588263000 | 0.829330000  |
| 8  | 5.928730000 | 1.080435000  | -0.200294000 |
| 92 | 3.768607000 | 0.279566000  | -0.757756000 |
| 6  | 3.423766000 | -0.332260000 | -3.313669000 |
| 1  | 3.265711000 | -0.540099000 | -4.384558000 |
| 8  | 3.100114000 | 0.801580000  | -2.817027000 |
| 8  | 3.917343000 | -1.180921000 | -2.528098000 |
| 17 | 4.096147000 | 3.217033000  | -0.887575000 |
| 1  | 2.832606000 | 3.530627000  | -0.893162000 |

**I (U<sub>Br</sub>) System**

|    |              |              |              |
|----|--------------|--------------|--------------|
| 92 | -0.813726000 | 0.237614000  | 0.148443000  |
| 35 | -2.238379000 | 2.299741000  | -0.608472000 |
| 35 | 1.444353000  | 1.445569000  | -0.111435000 |
| 6  | 0.611582000  | -2.805588000 | 0.093582000  |
| 1  | 1.036826000  | -3.797036000 | 0.040410000  |
| 6  | 0.124268000  | -1.679064000 | 0.160017000  |

**II (U<sub>Br</sub>) System**

|    |              |              |              |
|----|--------------|--------------|--------------|
| 92 | 0.499458000  | 0.532687000  | 0.361798000  |
| 35 | -2.068875000 | 0.849812000  | 0.688824000  |
| 35 | 1.211601000  | 3.071179000  | 0.709505000  |
| 6  | 0.396622000  | -2.709993000 | -0.619817000 |
| 1  | 0.401679000  | -3.734139000 | -0.957357000 |
| 6  | 0.388747000  | -1.542673000 | -0.238040000 |
| 6  | 0.372889000  | 0.762786000  | 3.611520000  |
| 1  | 0.633165000  | 0.345834000  | 4.598783000  |
| 8  | 0.774450000  | 0.227262000  | 2.580298000  |
| 8  | -0.356085000 | 1.817775000  | 3.538323000  |
| 1  | -0.630053000 | 2.165053000  | 4.402499000  |

**TSI (U<sub>Br</sub>) System**

|    |              |              |              |
|----|--------------|--------------|--------------|
| 92 | -0.478597000 | 0.981312000  | 0.742724000  |
| 35 | -1.096286000 | 0.293797000  | -1.720151000 |
| 35 | 2.004265000  | 1.537408000  | 0.237348000  |
| 6  | 0.009932000  | -1.149703000 | 1.554047000  |
| 6  | -0.300784000 | -1.857883000 | 0.592859000  |
| 1  | -0.548485000 | -2.507612000 | -0.234126000 |
| 6  | 0.356549000  | 0.889133000  | 3.818560000  |
| 1  | 0.452997000  | 1.553035000  | 4.691073000  |
| 8  | -0.195224000 | 1.388210000  | 2.753553000  |
| 8  | 0.744935000  | -0.273607000 | 3.865008000  |
| 1  | 0.463787000  | -0.783101000 | 2.817484000  |

**III (U<sub>Br</sub>) System**

|    |             |              |              |
|----|-------------|--------------|--------------|
| 6  | 1.705450000 | -0.006581000 | -0.273142000 |
| 1  | 0.632295000 | -0.240534000 | -0.365145000 |
| 8  | 2.124043000 | 1.180923000  | -0.138913000 |
| 8  | 2.589145000 | -0.919569000 | -0.298481000 |
| 92 | 4.257879000 | 0.522301000  | -0.075832000 |
| 35 | 4.723819000 | 0.569080000  | -2.659715000 |
| 35 | 4.148901000 | 0.419112000  | 2.547838000  |
| 6  | 4.310879000 | 3.287521000  | 0.755274000  |
| 1  | 4.303607000 | 3.354354000  | 1.831700000  |
| 6  | 4.317467000 | 3.232734000  | -0.459300000 |
| 1  | 4.304067000 | 3.384549000  | -1.529853000 |

**IV (U<sub>Br</sub>) System**

|   |             |              |              |
|---|-------------|--------------|--------------|
| 6 | 1.246209000 | -0.104842000 | -0.286859000 |
| 1 | 0.147907000 | -0.113582000 | -0.374654000 |

|    |             |              |              |
|----|-------------|--------------|--------------|
| 8  | 1.875679000 | 0.959767000  | 0.035562000  |
| 8  | 1.944819000 | -1.142026000 | -0.498378000 |
| 92 | 3.810052000 | -0.027895000 | -0.065108000 |
| 35 | 4.363928000 | 0.740706000  | -2.492354000 |
| 35 | 4.010763000 | -0.475880000 | 2.494063000  |

**V (U<sub>Br</sub>) System**

|    |             |              |              |
|----|-------------|--------------|--------------|
| 6  | 1.492595000 | 0.713704000  | 0.054179000  |
| 1  | 0.434340000 | 1.023087000  | 0.057621000  |
| 8  | 2.428960000 | 1.514708000  | 0.317467000  |
| 8  | 1.820050000 | -0.485463000 | -0.220804000 |
| 92 | 4.008746000 | -0.176616000 | 0.002818000  |
| 35 | 4.937516000 | -0.182645000 | -2.452932000 |
| 35 | 4.635806000 | -1.375639000 | 2.253667000  |
| 6  | 4.996370000 | 2.854667000  | 0.839000000  |
| 1  | 4.006526000 | 3.343477000  | 0.899029000  |
| 8  | 5.089083000 | 1.663587000  | 0.540635000  |
| 8  | 6.060291000 | 3.525063000  | 1.080004000  |
| 1  | 5.886863000 | 4.452646000  | 1.306379000  |

**TSII (U<sub>Br</sub>) System**

|    |             |              |              |
|----|-------------|--------------|--------------|
| 92 | 3.825382000 | 0.476813000  | -0.921459000 |
| 35 | 3.102627000 | -0.416041000 | -3.267868000 |
| 35 | 3.126999000 | 3.142891000  | -1.519661000 |
| 6  | 5.949492000 | 0.169644000  | 0.595079000  |
| 1  | 6.798890000 | 0.142906000  | 1.297650000  |
| 8  | 5.894683000 | -0.510891000 | -0.448092000 |
| 8  | 4.938398000 | 0.940891000  | 0.847329000  |
| 6  | 1.422479000 | 0.410191000  | 0.499547000  |
| 1  | 0.425923000 | 0.346474000  | 0.965572000  |
| 8  | 1.967837000 | -0.566945000 | -0.045344000 |
| 8  | 2.089546000 | 1.516038000  | 0.541776000  |
| 1  | 2.257997000 | 2.415185000  | -0.301425000 |

**VI (U<sub>Br</sub>) System**

|    |             |              |              |
|----|-------------|--------------|--------------|
| 6  | 1.863375000 | 0.440548000  | 0.467318000  |
| 1  | 1.025437000 | 0.359842000  | 1.179409000  |
| 6  | 5.607956000 | 0.088816000  | 0.616116000  |
| 1  | 6.255672000 | -0.029447000 | 1.500148000  |
| 8  | 2.091523000 | 1.509664000  | -0.171709000 |
| 8  | 2.641487000 | -0.538777000 | 0.257100000  |
| 8  | 5.490419000 | -0.776343000 | -0.269493000 |
| 8  | 4.928012000 | 1.183915000  | 0.471452000  |
| 92 | 3.850402000 | 0.546743000  | -1.282618000 |
| 35 | 2.888631000 | -0.637350000 | -3.425435000 |
| 35 | 3.715585000 | 3.554107000  | -1.852949000 |
| 1  | 2.688904000 | 3.684330000  | -0.882812000 |

**VII (U<sub>Br</sub>) System**

|   |             |             |             |
|---|-------------|-------------|-------------|
| 6 | 1.826149000 | 0.308665000 | 0.508170000 |
|---|-------------|-------------|-------------|

|    |             |              |              |
|----|-------------|--------------|--------------|
| 1  | 0.978803000 | 0.081397000  | 1.175335000  |
| 6  | 5.592478000 | 0.133434000  | 0.636640000  |
| 1  | 6.275274000 | -0.080834000 | 1.474745000  |
| 8  | 1.992715000 | 1.465929000  | 0.014704000  |
| 8  | 2.682043000 | -0.574684000 | 0.197187000  |
| 8  | 5.453403000 | -0.609957000 | -0.349062000 |
| 8  | 4.881351000 | 1.223275000  | 0.657674000  |
| 92 | 3.793502000 | 0.818819000  | -1.137989000 |
| 35 | 2.744555000 | -0.158439000 | -3.326684000 |

### VIII (UBr) System

|    |             |              |              |
|----|-------------|--------------|--------------|
| 6  | 1.548146000 | 0.382084000  | 0.372998000  |
| 1  | 0.890036000 | 0.736920000  | 1.183244000  |
| 6  | 5.155580000 | 1.083820000  | -0.116712000 |
| 1  | 5.921315000 | 1.626842000  | 0.462174000  |
| 8  | 2.118051000 | 1.238282000  | -0.402128000 |
| 8  | 1.768367000 | -0.827638000 | 0.163700000  |
| 8  | 4.570230000 | 0.074291000  | 0.366141000  |
| 8  | 4.833122000 | 1.454894000  | -1.286117000 |
| 92 | 3.305497000 | -0.252349000 | -1.501161000 |
| 35 | 4.437024000 | -2.359369000 | -2.656179000 |
| 6  | 3.240000000 | 2.340363000  | -3.531772000 |
| 1  | 4.007906000 | 2.885039000  | -2.952184000 |
| 8  | 2.880620000 | 1.211213000  | -3.208701000 |
| 8  | 2.718125000 | 2.894860000  | -4.566866000 |
| 1  | 3.072721000 | 3.780568000  | -4.740082000 |

### TSIII (UBr) System

|    |             |              |              |
|----|-------------|--------------|--------------|
| 92 | 3.846184000 | -0.050478000 | -1.627471000 |
| 8  | 3.150287000 | -1.081908000 | -3.387937000 |
| 35 | 3.044110000 | 2.555043000  | -2.554566000 |
| 6  | 5.920691000 | -0.228382000 | -0.006618000 |
| 1  | 6.786423000 | -0.229771000 | 0.675588000  |
| 8  | 5.638600000 | -1.202668000 | -0.746867000 |
| 8  | 5.151127000 | 0.796892000  | -0.071382000 |
| 6  | 1.236446000 | 0.025411000  | -0.575636000 |
| 1  | 0.152023000 | 0.082921000  | -0.386297000 |
| 8  | 1.814196000 | -1.028228000 | -0.876553000 |
| 8  | 1.976415000 | 1.087229000  | -0.468498000 |
| 1  | 2.103193000 | 1.980803000  | -1.303163000 |
| 6  | 3.969468000 | -0.525236000 | -4.227339000 |
| 8  | 4.749648000 | 0.329644000  | -3.774863000 |
| 1  | 3.942045000 | -0.825512000 | -5.287421000 |

### IX (UBr) System

|   |             |             |             |
|---|-------------|-------------|-------------|
| 6 | 1.454606000 | 0.412083000 | 0.589943000 |
| 1 | 0.520936000 | 0.429683000 | 1.177143000 |
| 6 | 6.022994000 | 0.167612000 | 0.652795000 |
| 1 | 6.927639000 | 0.010239000 | 1.262881000 |
| 8 | 1.925331000 | 1.454282000 | 0.057816000 |

|    |             |              |              |
|----|-------------|--------------|--------------|
| 8  | 2.102147000 | -0.667638000 | 0.423832000  |
| 8  | 4.979938000 | -0.558768000 | 0.853304000  |
| 8  | 5.949892000 | 1.037171000  | -0.241206000 |
| 92 | 3.761182000 | 0.275733000  | -0.773762000 |
| 6  | 3.424461000 | -0.362533000 | -3.325020000 |
| 1  | 3.269556000 | -0.581661000 | -4.394127000 |
| 8  | 3.080889000 | 0.769417000  | -2.838065000 |
| 8  | 3.934445000 | -1.196200000 | -2.533927000 |
| 35 | 4.155822000 | 3.302946000  | -0.832803000 |
| 1  | 2.795749000 | 3.695458000  | -0.880669000 |

**I (ThF) System**

|    |              |              |              |
|----|--------------|--------------|--------------|
| 90 | 0.167442000  | 0.741262000  | 0.556714000  |
| 9  | -1.486469000 | 1.503501000  | -0.296412000 |
| 9  | 1.834662000  | 1.510086000  | -0.264406000 |
| 6  | 0.175635000  | -2.678784000 | -0.070377000 |
| 1  | 0.177425000  | -3.740279000 | -0.264717000 |
| 6  | 0.173456000  | -1.468653000 | 0.152817000  |

**II (ThF) System**

|    |              |              |              |
|----|--------------|--------------|--------------|
| 90 | 0.010622000  | 0.959444000  | 0.172065000  |
| 9  | -1.937284000 | 1.501648000  | -0.129322000 |
| 9  | 1.529016000  | 2.006441000  | -0.710417000 |
| 6  | 0.543305000  | -2.657160000 | 0.015400000  |
| 1  | 0.512138000  | -3.364791000 | -0.825696000 |
| 6  | 0.348711000  | -1.345713000 | 0.082534000  |
| 6  | 0.370968000  | 0.975685000  | 3.706728000  |
| 1  | 1.279647000  | 1.134954000  | 4.310983000  |
| 8  | 0.414185000  | 0.965130000  | 2.478521000  |
| 8  | -0.758675000 | 0.792712000  | 4.304161000  |
| 1  | -0.689034000 | 0.817230000  | 5.271380000  |

**TSI (ThF) System**

|    |              |              |              |
|----|--------------|--------------|--------------|
| 90 | 0.132957000  | 0.916470000  | 0.444709000  |
| 9  | -1.616748000 | 1.443566000  | -0.428995000 |
| 9  | 1.875521000  | 1.336842000  | -0.499372000 |
| 6  | 0.085105000  | -1.372823000 | 1.567161000  |
| 6  | 0.054535000  | -2.145784000 | 0.614136000  |
| 1  | 0.027334000  | -2.853180000 | -0.202655000 |
| 6  | 0.185655000  | 0.908005000  | 3.752486000  |
| 1  | 0.220807000  | 1.610107000  | 4.600534000  |
| 8  | 0.186053000  | 1.419100000  | 2.558845000  |
| 8  | 0.147828000  | -0.301606000 | 3.938750000  |
| 1  | 0.114040000  | -0.889708000 | 2.772780000  |

**III (ThF) System**

|   |             |              |              |
|---|-------------|--------------|--------------|
| 6 | 1.469913000 | -0.068208000 | -0.311448000 |
| 1 | 0.397768000 | -0.288806000 | -0.442841000 |
| 8 | 1.887814000 | 1.127530000  | -0.223692000 |
| 8 | 2.329021000 | -0.997236000 | -0.241876000 |

|    |             |             |              |
|----|-------------|-------------|--------------|
| 90 | 4.105698000 | 0.493916000 | 0.011412000  |
| 9  | 5.046030000 | 0.797884000 | -1.764134000 |
| 9  | 4.637798000 | 0.664935000 | 1.965847000  |
| 6  | 4.229966000 | 3.291607000 | 0.763667000  |
| 1  | 4.170509000 | 3.300361000 | 1.842296000  |
| 6  | 4.308697000 | 3.331613000 | -0.446510000 |
| 1  | 4.388224000 | 3.434241000 | -1.519247000 |

#### IV (ThF) System

|    |              |              |              |
|----|--------------|--------------|--------------|
| 6  | 1.050576000  | -0.004883000 | -0.268871000 |
| 1  | -0.048046000 | 0.003102000  | -0.355960000 |
| 8  | 1.695128000  | 1.047376000  | 0.041512000  |
| 8  | 1.725077000  | -1.059541000 | -0.474918000 |
| 90 | 3.738770000  | 0.017404000  | -0.062159000 |
| 9  | 4.693004000  | 0.785281000  | -1.660495000 |
| 9  | 4.460333000  | -0.062593000 | 1.816881000  |

#### V (ThF) System

|    |             |              |              |
|----|-------------|--------------|--------------|
| 6  | 1.517528000 | 0.718551000  | 0.053798000  |
| 1  | 0.475948000 | 1.081615000  | 0.069427000  |
| 8  | 2.485076000 | 1.492343000  | 0.316704000  |
| 8  | 1.777158000 | -0.487003000 | -0.229201000 |
| 90 | 4.096212000 | -0.258398000 | -0.013566000 |
| 9  | 4.795033000 | -0.507218000 | -1.905456000 |
| 9  | 4.563139000 | -1.392364000 | 1.607205000  |
| 6  | 5.030213000 | 2.914131000  | 0.858435000  |
| 1  | 4.011005000 | 3.343647000  | 0.895398000  |
| 8  | 5.207208000 | 1.732636000  | 0.571079000  |
| 8  | 6.041425000 | 3.659309000  | 1.119201000  |
| 1  | 5.797201000 | 4.573327000  | 1.334039000  |

#### TSII (ThF) System

|    |             |              |              |
|----|-------------|--------------|--------------|
| 90 | 3.793447000 | 0.437749000  | -0.893604000 |
| 9  | 3.678797000 | -0.089735000 | -2.835064000 |
| 9  | 3.095436000 | 2.672546000  | -0.506583000 |
| 6  | 6.201356000 | 0.163978000  | 0.311055000  |
| 1  | 7.176941000 | 0.042731000  | 0.808760000  |
| 8  | 5.425651000 | -0.826825000 | 0.130019000  |
| 8  | 5.807604000 | 1.293568000  | -0.106868000 |
| 6  | 1.045327000 | 0.486040000  | 0.293579000  |
| 1  | 0.109522000 | 0.089785000  | 0.719552000  |
| 8  | 2.134360000 | -0.160328000 | 0.500111000  |
| 8  | 1.036966000 | 1.511619000  | -0.410738000 |
| 1  | 2.108463000 | 2.393461000  | -0.440947000 |

#### VI (ThF) System

|   |             |             |             |
|---|-------------|-------------|-------------|
| 6 | 1.206248000 | 0.258653000 | 0.476419000 |
| 1 | 0.231548000 | 0.191410000 | 0.986677000 |
| 6 | 6.016769000 | 0.319203000 | 0.355236000 |
| 1 | 7.016564000 | 0.276549000 | 0.817317000 |

|    |             |              |              |
|----|-------------|--------------|--------------|
| 8  | 1.729744000 | 1.377467000  | 0.200541000  |
| 8  | 1.838948000 | -0.788324000 | 0.136849000  |
| 8  | 5.392452000 | -0.743623000 | 0.050900000  |
| 8  | 5.454666000 | 1.424480000  | 0.101612000  |
| 90 | 3.577905000 | 0.384120000  | -0.873326000 |
| 9  | 3.531322000 | 0.167577000  | -2.881235000 |
| 9  | 3.534263000 | 2.793889000  | -1.394696000 |
| 1  | 3.516977000 | 3.724647000  | -1.369768000 |

#### VII (ThF) System

|    |             |              |              |
|----|-------------|--------------|--------------|
| 6  | 1.242078000 | 0.258477000  | 0.525129000  |
| 1  | 0.263692000 | 0.243087000  | 1.031917000  |
| 6  | 6.026934000 | 0.222095000  | 0.396856000  |
| 1  | 7.030429000 | 0.194418000  | 0.851349000  |
| 8  | 1.828457000 | 1.351695000  | 0.255603000  |
| 8  | 1.823180000 | -0.816330000 | 0.179743000  |
| 8  | 5.423228000 | -0.843938000 | 0.064595000  |
| 8  | 5.432789000 | 1.322717000  | 0.176836000  |
| 90 | 3.600863000 | 0.298154000  | -0.809307000 |
| 9  | 3.548624000 | 0.377230000  | -2.821999000 |

#### VIII (ThF) System

|    |             |              |              |
|----|-------------|--------------|--------------|
| 6  | 1.500038000 | 0.668830000  | -0.033458000 |
| 1  | 0.669053000 | 1.045586000  | 0.587807000  |
| 6  | 5.412997000 | 1.022539000  | -0.173357000 |
| 1  | 6.101526000 | 1.657164000  | 0.408912000  |
| 8  | 2.395901000 | 1.429603000  | -0.468676000 |
| 8  | 1.560979000 | -0.577418000 | -0.316647000 |
| 8  | 4.915707000 | -0.026259000 | 0.341895000  |
| 8  | 5.101582000 | 1.311464000  | -1.361229000 |
| 90 | 3.551500000 | -0.507800000 | -1.460892000 |
| 9  | 4.275192000 | -2.189385000 | -2.345789000 |
| 6  | 3.083886000 | 2.180523000  | -3.288720000 |
| 1  | 3.526860000 | 2.776576000  | -2.468660000 |
| 8  | 3.030906000 | 0.952695000  | -3.231499000 |
| 8  | 2.621660000 | 2.780999000  | -4.325293000 |
| 1  | 2.718952000 | 3.744703000  | -4.278037000 |

#### TSIII (ThF) System

|    |             |              |              |
|----|-------------|--------------|--------------|
| 90 | 3.791092000 | 0.306652000  | -1.174745000 |
| 9  | 2.585537000 | 2.214199000  | -1.816178000 |
| 6  | 5.815908000 | 0.249722000  | 0.634145000  |
| 1  | 6.664365000 | 0.191394000  | 1.335298000  |
| 8  | 5.961014000 | 0.757662000  | -0.525518000 |
| 8  | 4.669940000 | -0.180521000 | 0.947836000  |
| 6  | 1.554350000 | 0.680172000  | 0.626727000  |
| 1  | 0.890630000 | 0.555754000  | 1.497121000  |
| 8  | 1.810792000 | -0.293784000 | -0.129001000 |
| 8  | 2.100603000 | 1.806783000  | 0.415522000  |
| 1  | 2.191727000 | 2.217851000  | -0.823453000 |

|   |             |              |              |
|---|-------------|--------------|--------------|
| 8 | 3.944586000 | -0.354088000 | -3.406267000 |
| 6 | 3.641202000 | -1.555936000 | -3.136350000 |
| 8 | 3.474140000 | -1.857571000 | -1.916009000 |
| 1 | 3.524488000 | -2.308689000 | -3.932189000 |

**IX (ThF) System**

|    |             |              |              |
|----|-------------|--------------|--------------|
| 6  | 1.323154000 | 0.483297000  | 0.738593000  |
| 1  | 0.390006000 | 0.537446000  | 1.322453000  |
| 6  | 6.049077000 | 0.234712000  | 0.599843000  |
| 1  | 7.014042000 | 0.197692000  | 1.130516000  |
| 8  | 1.873163000 | 1.525943000  | 0.277306000  |
| 8  | 1.882659000 | -0.628790000 | 0.505220000  |
| 8  | 5.384402000 | -0.822457000 | 0.378406000  |
| 8  | 5.564506000 | 1.328940000  | 0.189301000  |
| 90 | 3.651068000 | 0.295571000  | -0.714864000 |
| 6  | 3.554631000 | -0.332241000 | -3.374528000 |
| 1  | 3.517567000 | -0.591893000 | -4.444711000 |
| 8  | 3.608688000 | 0.873105000  | -2.991755000 |
| 8  | 3.544813000 | -1.232519000 | -2.482215000 |
| 9  | 3.699958000 | 2.791302000  | -1.140627000 |
| 1  | 3.247854000 | 3.527714000  | -0.794802000 |

**X (ThF) System**

|    |             |              |              |
|----|-------------|--------------|--------------|
| 6  | 1.322047000 | 0.503771000  | 0.663298000  |
| 1  | 0.387673000 | 0.654169000  | 1.227180000  |
| 6  | 6.025423000 | 0.291925000  | 0.548898000  |
| 1  | 6.996172000 | 0.355340000  | 1.065898000  |
| 8  | 1.926882000 | 1.477986000  | 0.120919000  |
| 8  | 1.833406000 | -0.649489000 | 0.532822000  |
| 8  | 5.400018000 | -0.807712000 | 0.456526000  |
| 8  | 5.491727000 | 1.315545000  | 0.023612000  |
| 90 | 3.629285000 | 0.134580000  | -0.727211000 |
| 6  | 3.543059000 | -0.399652000 | -3.392020000 |
| 1  | 3.508926000 | -0.615533000 | -4.471779000 |
| 8  | 3.608066000 | 0.791694000  | -2.961244000 |
| 8  | 3.518781000 | -1.332745000 | -2.533478000 |

**I (NpF) System**

|    |              |              |              |
|----|--------------|--------------|--------------|
| 93 | 0.166416000  | 0.711996000  | 0.651525000  |
| 9  | -1.387061000 | 1.338715000  | -0.336180000 |
| 9  | 1.736647000  | 1.342596000  | -0.307024000 |
| 6  | 0.175514000  | -2.557954000 | -0.075173000 |
| 1  | 0.178372000  | -3.611312000 | -0.311696000 |
| 6  | 0.172262000  | -1.356908000 | 0.192166000  |

**II (NpF) System**

|    |              |              |              |
|----|--------------|--------------|--------------|
| 93 | 0.087882000  | 0.816436000  | 0.299677000  |
| 9  | -1.722197000 | 1.394493000  | -0.222661000 |
| 9  | 1.552789000  | 1.766964000  | -0.612442000 |
| 6  | 0.363364000  | -2.495582000 | -0.361740000 |

|   |              |              |              |
|---|--------------|--------------|--------------|
| 1 | 0.446050000  | -3.549527000 | -0.569454000 |
| 6 | 0.267753000  | -1.293749000 | -0.124254000 |
| 6 | 0.338745000  | 1.167874000  | 3.750306000  |
| 1 | 1.063251000  | 1.720745000  | 4.373924000  |
| 8 | 0.426823000  | 1.170509000  | 2.527819000  |
| 8 | -0.608741000 | 0.513273000  | 4.323147000  |
| 1 | -0.592120000 | 0.574145000  | 5.292016000  |

**TSI (NpF) System**

|    |              |              |              |
|----|--------------|--------------|--------------|
| 93 | 0.136307000  | 0.952022000  | 0.551172000  |
| 9  | -1.294155000 | 0.483622000  | -0.723505000 |
| 9  | 1.900710000  | 1.398409000  | -0.176033000 |
| 6  | 0.262278000  | -1.209571000 | 1.510983000  |
| 6  | -0.227000000 | -1.860480000 | 0.590454000  |
| 1  | -0.646034000 | -2.433788000 | -0.225108000 |
| 6  | 0.196053000  | 0.888682000  | 3.760273000  |
| 1  | 0.063118000  | 1.560049000  | 4.623788000  |
| 8  | -0.006641000 | 1.404706000  | 2.581289000  |
| 8  | 0.523866000  | -0.279069000 | 3.908831000  |
| 1  | 0.504587000  | -0.833593000 | 2.716235000  |

**III (NpF) System**

|    |             |              |              |
|----|-------------|--------------|--------------|
| 6  | 1.627852000 | 0.012354000  | -0.249831000 |
| 1  | 0.552554000 | -0.210277000 | -0.345981000 |
| 8  | 2.057521000 | 1.195651000  | -0.114003000 |
| 8  | 2.503293000 | -0.907027000 | -0.267850000 |
| 93 | 4.173433000 | 0.522922000  | 0.033154000  |
| 9  | 4.739368000 | 0.891237000  | -1.814142000 |
| 9  | 4.313333000 | 0.584182000  | 1.989977000  |
| 6  | 4.168313000 | 3.156088000  | 0.697099000  |
| 1  | 4.015341000 | 3.171094000  | 1.766905000  |
| 6  | 4.339125000 | 3.278554000  | -0.499102000 |
| 1  | 4.481303000 | 3.393060000  | -1.562751000 |

**IV (NpF) System**

|    |             |              |              |
|----|-------------|--------------|--------------|
| 6  | 1.200340000 | -0.092043000 | -0.278074000 |
| 1  | 0.104786000 | -0.140312000 | -0.385239000 |
| 8  | 1.801125000 | 0.983333000  | 0.033180000  |
| 8  | 1.942850000 | -1.106472000 | -0.460228000 |
| 93 | 3.778691000 | 0.034976000  | -0.064694000 |
| 9  | 4.423326000 | 0.516485000  | -1.839441000 |
| 9  | 4.148241000 | -0.359719000 | 1.806768000  |

**V (NpF) System**

|    |             |              |              |
|----|-------------|--------------|--------------|
| 6  | 1.574668000 | 0.705893000  | 0.048384000  |
| 1  | 0.528757000 | 1.055402000  | 0.050592000  |
| 8  | 2.539838000 | 1.491444000  | 0.280541000  |
| 8  | 1.863791000 | -0.501705000 | -0.190074000 |
| 93 | 4.081408000 | -0.193322000 | -0.031574000 |
| 9  | 4.678968000 | -0.427947000 | -1.890235000 |

|   |             |              |             |
|---|-------------|--------------|-------------|
| 9 | 4.550778000 | -1.160514000 | 1.614843000 |
| 6 | 5.005741000 | 2.856125000  | 0.851169000 |
| 1 | 3.990007000 | 3.292424000  | 0.884992000 |
| 8 | 5.175662000 | 1.680354000  | 0.532686000 |
| 8 | 6.021282000 | 3.580573000  | 1.144718000 |
| 1 | 5.786245000 | 4.491847000  | 1.381021000 |

**TSII (NpF) System**

|    |             |              |              |
|----|-------------|--------------|--------------|
| 93 | 3.780370000 | 0.318072000  | -0.852705000 |
| 9  | 3.772984000 | -0.355373000 | -2.689266000 |
| 9  | 3.268190000 | 2.569838000  | -0.485992000 |
| 6  | 6.110640000 | 0.230036000  | 0.339450000  |
| 1  | 7.097809000 | 0.146993000  | 0.822065000  |
| 8  | 5.363083000 | -0.791075000 | 0.168382000  |
| 8  | 5.649816000 | 1.326367000  | -0.079463000 |
| 6  | 1.023119000 | 0.540104000  | 0.208979000  |
| 1  | 0.105759000 | 0.101659000  | 0.634781000  |
| 8  | 2.123386000 | -0.153419000 | 0.331113000  |
| 8  | 1.029672000 | 1.613720000  | -0.380476000 |
| 1  | 2.289046000 | 2.467665000  | -0.447596000 |

**VI (NpF) System**

|    |             |              |              |
|----|-------------|--------------|--------------|
| 6  | 1.790965000 | 0.463325000  | 0.431051000  |
| 1  | 1.017793000 | 0.409708000  | 1.214276000  |
| 6  | 5.564318000 | 0.247715000  | 0.524019000  |
| 1  | 6.268382000 | 0.053713000  | 1.349903000  |
| 8  | 1.992933000 | 1.508750000  | -0.246422000 |
| 8  | 2.528713000 | -0.535780000 | 0.161301000  |
| 8  | 5.545356000 | -0.488319000 | -0.512479000 |
| 8  | 4.742177000 | 1.208861000  | 0.566350000  |
| 93 | 3.738008000 | 0.519549000  | -1.344255000 |
| 9  | 3.101190000 | -0.315056000 | -2.992098000 |
| 9  | 3.656596000 | 2.935572000  | -1.577118000 |
| 1  | 3.100973000 | 3.378009000  | -0.967999000 |

**VII (NpF) System**

|    |             |              |              |
|----|-------------|--------------|--------------|
| 6  | 1.868062000 | 0.310822000  | 0.447279000  |
| 1  | 1.056850000 | 0.130769000  | 1.170643000  |
| 6  | 5.520101000 | 0.159169000  | 0.608207000  |
| 1  | 6.244672000 | -0.129136000 | 1.386941000  |
| 8  | 2.010315000 | 1.429839000  | -0.134979000 |
| 8  | 2.703883000 | -0.590449000 | 0.142166000  |
| 8  | 5.394704000 | -0.516024000 | -0.463914000 |
| 8  | 4.776803000 | 1.173675000  | 0.726987000  |
| 93 | 3.774070000 | 0.738948000  | -1.263903000 |
| 9  | 2.870813000 | -0.100008000 | -2.768707000 |

**VIII (NpF) System**

|   |             |             |              |
|---|-------------|-------------|--------------|
| 6 | 1.584223000 | 0.507437000 | -0.102768000 |
| 1 | 0.755043000 | 0.793332000 | 0.565859000  |

|    |             |              |              |
|----|-------------|--------------|--------------|
| 6  | 5.318122000 | 1.109172000  | -0.173349000 |
| 1  | 5.958035000 | 1.761205000  | 0.443075000  |
| 8  | 2.438959000 | 1.337206000  | -0.495896000 |
| 8  | 1.697373000 | -0.703355000 | -0.495559000 |
| 8  | 4.782798000 | 0.068302000  | 0.314739000  |
| 8  | 5.090805000 | 1.357960000  | -1.388697000 |
| 93 | 3.632679000 | -0.423406000 | -1.529807000 |
| 9  | 4.427862000 | -2.057441000 | -2.279771000 |
| 6  | 3.050726000 | 2.193223000  | -3.232773000 |
| 1  | 3.390102000 | 2.777327000  | -2.357534000 |
| 8  | 3.089753000 | 0.963635000  | -3.237784000 |
| 8  | 2.614859000 | 2.810334000  | -4.270365000 |
| 1  | 2.635402000 | 3.774890000  | -4.173015000 |

**TSIII (NpF) System**

|    |             |              |              |
|----|-------------|--------------|--------------|
| 93 | 3.724626000 | 0.312371000  | -1.405166000 |
| 9  | 2.632646000 | 2.290002000  | -1.660136000 |
| 6  | 5.427507000 | 0.352362000  | 0.593765000  |
| 1  | 6.128986000 | 0.458115000  | 1.436722000  |
| 8  | 5.561340000 | 1.052993000  | -0.469066000 |
| 8  | 4.462126000 | -0.452962000 | 0.613666000  |
| 6  | 1.849150000 | 0.666196000  | 0.633877000  |
| 1  | 1.269833000 | 0.422855000  | 1.538652000  |
| 8  | 1.827821000 | -0.109468000 | -0.364140000 |
| 8  | 2.567712000 | 1.707643000  | 0.595397000  |
| 1  | 2.505052000 | 2.288251000  | -0.613502000 |
| 8  | 4.102582000 | -0.515140000 | -3.388070000 |
| 6  | 3.659045000 | -1.690264000 | -3.107848000 |
| 8  | 3.302309000 | -1.883305000 | -1.922807000 |
| 1  | 3.599640000 | -2.470049000 | -3.884406000 |

**IX (NpF) System**

|    |             |              |              |
|----|-------------|--------------|--------------|
| 6  | 1.428316000 | 0.481266000  | 0.664267000  |
| 1  | 0.511461000 | 0.509778000  | 1.275886000  |
| 6  | 5.966637000 | 0.175210000  | 0.549674000  |
| 1  | 6.947390000 | 0.072018000  | 1.042223000  |
| 8  | 1.974637000 | 1.549726000  | 0.237277000  |
| 8  | 1.987311000 | -0.604425000 | 0.354385000  |
| 8  | 5.115243000 | -0.755590000 | 0.554177000  |
| 8  | 5.637348000 | 1.247393000  | -0.053082000 |
| 93 | 3.682467000 | 0.434025000  | -0.746563000 |
| 6  | 3.558836000 | -0.325865000 | -3.270914000 |
| 1  | 3.486535000 | -0.633963000 | -4.326785000 |
| 8  | 3.469201000 | 0.894316000  | -2.925343000 |
| 8  | 3.737281000 | -1.164800000 | -2.343230000 |
| 9  | 3.758194000 | 2.882768000  | -1.032747000 |
| 1  | 3.044731000 | 3.425967000  | -0.781090000 |

**X (NpF) System**

|   |             |             |             |
|---|-------------|-------------|-------------|
| 6 | 1.401053000 | 0.492115000 | 0.616729000 |
|---|-------------|-------------|-------------|

|    |             |              |              |
|----|-------------|--------------|--------------|
| 1  | 0.465671000 | 0.642839000  | 1.179822000  |
| 6  | 5.943725000 | 0.285803000  | 0.505335000  |
| 1  | 6.914402000 | 0.349839000  | 1.023419000  |
| 8  | 2.014677000 | 1.456357000  | 0.066404000  |
| 8  | 1.924777000 | -0.655474000 | 0.481992000  |
| 8  | 5.308805000 | -0.807936000 | 0.404292000  |
| 8  | 5.397883000 | 1.301453000  | -0.023498000 |
| 93 | 3.629307000 | 0.132765000  | -0.727250000 |
| 6  | 3.545904000 | -0.381137000 | -3.301830000 |
| 1  | 3.511785000 | -0.596578000 | -4.382180000 |
| 8  | 3.607614000 | 0.805268000  | -2.856591000 |
| 8  | 3.525862000 | -1.305432000 | -2.433223000 |

**I (PuF) System**

|    |              |              |              |
|----|--------------|--------------|--------------|
| 94 | 0.215169000  | 0.730553000  | 0.697642000  |
| 9  | -1.328495000 | 1.151531000  | -0.373845000 |
| 9  | 1.709473000  | 1.389064000  | -0.316113000 |
| 6  | 0.145445000  | -2.516756000 | -0.079334000 |
| 1  | 0.119358000  | -3.562659000 | -0.347577000 |
| 6  | 0.181199000  | -1.324601000 | 0.232845000  |

**II (PuF) System**

|    |              |              |              |
|----|--------------|--------------|--------------|
| 94 | 0.054342000  | 0.884015000  | 0.323329000  |
| 9  | -1.779661000 | 1.212070000  | -0.258524000 |
| 9  | 1.496434000  | 1.706246000  | -0.705307000 |
| 6  | 0.434041000  | -2.397730000 | -0.379501000 |
| 1  | 0.554507000  | -3.446462000 | -0.596331000 |
| 6  | 0.296899000  | -1.199928000 | -0.128240000 |
| 6  | 0.349044000  | 1.045805000  | 3.769037000  |
| 1  | 1.271719000  | 1.223727000  | 4.349290000  |
| 8  | 0.363724000  | 1.037316000  | 2.543544000  |
| 8  | -0.755199000 | 0.846462000  | 4.396538000  |
| 1  | -0.662250000 | 0.874060000  | 5.362500000  |

**TSI (PuF) System**

|    |              |              |              |
|----|--------------|--------------|--------------|
| 94 | -0.134257000 | 0.953118000  | 0.602454000  |
| 9  | -1.181776000 | 0.376397000  | -0.946930000 |
| 9  | 1.747244000  | 1.199010000  | 0.243730000  |
| 6  | 0.130215000  | -1.172948000 | 1.500660000  |
| 6  | -0.208759000 | -1.830248000 | 0.518987000  |
| 1  | -0.511591000 | -2.409478000 | -0.342021000 |
| 6  | 0.295787000  | 0.932264000  | 3.750388000  |
| 1  | 0.300806000  | 1.613345000  | 4.617125000  |
| 8  | -0.072687000 | 1.448925000  | 2.611831000  |
| 8  | 0.612649000  | -0.241799000 | 3.866284000  |
| 1  | 0.435458000  | -0.797596000 | 2.695871000  |

**III (PuF) System**

|   |             |              |              |
|---|-------------|--------------|--------------|
| 6 | 1.691388000 | 0.018563000  | -0.268452000 |
| 1 | 0.621388000 | -0.228285000 | -0.364642000 |

|    |             |              |              |
|----|-------------|--------------|--------------|
| 8  | 2.108200000 | 1.209685000  | -0.239639000 |
| 8  | 2.575098000 | -0.892473000 | -0.171352000 |
| 94 | 4.208936000 | 0.542459000  | -0.011312000 |
| 9  | 4.684283000 | 0.839771000  | -1.871492000 |
| 9  | 4.165498000 | 0.563274000  | 1.927092000  |
| 6  | 4.201071000 | 3.128032000  | 0.709614000  |
| 1  | 4.038385000 | 3.125185000  | 1.777879000  |
| 6  | 4.372640000 | 3.260780000  | -0.485760000 |
| 1  | 4.515545000 | 3.393454000  | -1.547610000 |

**IV (PuF) System**

|    |             |              |              |
|----|-------------|--------------|--------------|
| 6  | 1.287241000 | -0.082549000 | -0.295061000 |
| 1  | 0.195012000 | -0.129399000 | -0.432420000 |
| 8  | 1.883018000 | 0.992249000  | 0.024945000  |
| 8  | 2.033063000 | -1.096566000 | -0.459372000 |
| 94 | 3.833162000 | 0.037257000  | -0.019588000 |
| 9  | 4.137802000 | 0.496026000  | -1.856873000 |
| 9  | 4.030059000 | -0.380771000 | 1.850640000  |

**V (PuF) System**

|    |             |              |              |
|----|-------------|--------------|--------------|
| 6  | 1.677042000 | 0.593003000  | 0.012442000  |
| 1  | 0.627760000 | 0.931695000  | 0.000589000  |
| 8  | 2.624576000 | 1.372718000  | 0.314697000  |
| 8  | 1.983172000 | -0.598807000 | -0.283214000 |
| 94 | 4.149390000 | -0.264478000 | 0.007776000  |
| 9  | 4.340174000 | 0.133548000  | -1.877488000 |
| 9  | 4.212166000 | -0.779850000 | 1.875094000  |
| 6  | 5.054642000 | 2.762866000  | 0.831146000  |
| 1  | 4.027185000 | 3.167461000  | 0.881304000  |
| 8  | 5.254604000 | 1.586359000  | 0.542144000  |
| 8  | 6.054436000 | 3.529044000  | 1.077371000  |
| 1  | 5.792000000 | 4.437017000  | 1.295201000  |

**TSII (PuF) System**

|    |             |              |              |
|----|-------------|--------------|--------------|
| 94 | 3.433003000 | -0.159302000 | -1.159963000 |
| 9  | 2.769741000 | 1.857184000  | -1.771094000 |
| 6  | 5.332695000 | 0.263370000  | 0.518831000  |
| 1  | 6.169657000 | 0.424138000  | 1.217275000  |
| 8  | 5.254283000 | 0.890136000  | -0.581088000 |
| 8  | 4.404199000 | -0.568035000 | 0.767468000  |
| 6  | 1.866957000 | 0.880579000  | 0.864649000  |
| 1  | 1.376860000 | 0.931909000  | 1.849504000  |
| 8  | 1.609963000 | -0.059911000 | 0.061638000  |
| 8  | 2.734086000 | 1.747792000  | 0.539813000  |
| 1  | 2.728902000 | 2.067158000  | -0.692234000 |
| 9  | 4.079638000 | -1.498744000 | -2.388612000 |

**VI (PuF) System**

|   |             |             |             |
|---|-------------|-------------|-------------|
| 6 | 1.837151000 | 0.419139000 | 0.394828000 |
| 1 | 1.053774000 | 0.380914000 | 1.169030000 |
| 6 | 5.500123000 | 0.366771000 | 0.537533000 |

|    |             |              |              |
|----|-------------|--------------|--------------|
| 1  | 6.216676000 | 0.251367000  | 1.367125000  |
| 8  | 2.044913000 | 1.454277000  | -0.296638000 |
| 8  | 2.568102000 | -0.592596000 | 0.148658000  |
| 8  | 5.496492000 | -0.441574000 | -0.448123000 |
| 8  | 4.650886000 | 1.293357000  | 0.501650000  |
| 94 | 3.722524000 | 0.420795000  | -1.402284000 |
| 9  | 2.813772000 | -0.136947000 | -3.011056000 |
| 9  | 3.784343000 | 2.815528000  | -1.558124000 |
| 1  | 3.358649000 | 3.155017000  | -0.796073000 |

**VII (PuF) System**

|    |             |              |              |
|----|-------------|--------------|--------------|
| 6  | 1.364909000 | 0.234268000  | 0.414186000  |
| 1  | 0.355477000 | 0.203527000  | 0.855584000  |
| 6  | 5.941698000 | 0.234885000  | 0.466199000  |
| 1  | 6.938010000 | 0.205850000  | 0.936205000  |
| 8  | 1.970126000 | 1.331171000  | 0.203405000  |
| 8  | 1.976426000 | -0.825453000 | 0.069476000  |
| 8  | 5.332800000 | -0.823116000 | 0.114548000  |
| 8  | 5.338103000 | 1.329357000  | 0.237376000  |
| 94 | 3.648502000 | 0.311388000  | -0.769697000 |
| 9  | 3.354223000 | 0.405726000  | -2.676561000 |

**VIII (PuF) System**

|    |             |              |              |
|----|-------------|--------------|--------------|
| 6  | 1.645297000 | 0.602200000  | 0.119986000  |
| 1  | 0.933594000 | 1.001329000  | 0.861816000  |
| 6  | 5.196784000 | 0.986830000  | -0.175549000 |
| 1  | 5.898687000 | 1.577378000  | 0.435408000  |
| 8  | 2.340035000 | 1.376833000  | -0.601726000 |
| 8  | 1.791292000 | -0.642947000 | -0.040745000 |
| 8  | 4.551637000 | 0.018372000  | 0.324920000  |
| 8  | 5.000993000 | 1.237107000  | -1.395222000 |
| 94 | 3.435902000 | -0.399514000 | -1.550151000 |
| 9  | 4.333215000 | -1.884397000 | -2.426705000 |
| 6  | 3.138424000 | 2.167556000  | -3.362998000 |
| 1  | 3.515777000 | 2.751728000  | -2.503158000 |
| 8  | 3.090164000 | 0.940756000  | -3.331689000 |
| 8  | 2.752109000 | 2.787086000  | -4.420409000 |
| 1  | 2.842832000 | 3.749502000  | -4.347420000 |

**TSIII (PuF) System**

|    |             |              |              |
|----|-------------|--------------|--------------|
| 94 | 3.635937000 | 0.126248000  | -1.298860000 |
| 9  | 2.636261000 | 2.093693000  | -1.737411000 |
| 6  | 5.409816000 | 0.344366000  | 0.603089000  |
| 1  | 6.158175000 | 0.436657000  | 1.406000000  |
| 8  | 5.528650000 | 0.915734000  | -0.526709000 |
| 8  | 4.383075000 | -0.374343000 | 0.756957000  |
| 6  | 1.835246000 | 0.768941000  | 0.729794000  |
| 1  | 1.282872000 | 0.588724000  | 1.665688000  |
| 8  | 1.800161000 | -0.107098000 | -0.195750000 |
| 8  | 2.522608000 | 1.808884000  | 0.580270000  |

|   |             |              |              |
|---|-------------|--------------|--------------|
| 1 | 2.514379000 | 2.218050000  | -0.699442000 |
| 8 | 4.023965000 | -0.417711000 | -3.401295000 |
| 6 | 3.729390000 | -1.640162000 | -3.215333000 |
| 8 | 3.439551000 | -1.964453000 | -2.027766000 |
| 1 | 3.720288000 | -2.367931000 | -4.042293000 |

**IX (PuF) System**

|    |             |              |              |
|----|-------------|--------------|--------------|
| 6  | 1.421435000 | 0.496501000  | 0.654644000  |
| 1  | 0.507522000 | 0.523302000  | 1.270346000  |
| 6  | 5.954106000 | 0.185455000  | 0.512818000  |
| 1  | 6.943883000 | 0.065321000  | 0.982629000  |
| 8  | 2.009830000 | 1.555954000  | 0.283671000  |
| 8  | 1.937323000 | -0.595649000 | 0.279767000  |
| 8  | 5.064414000 | -0.714678000 | 0.596216000  |
| 8  | 5.643496000 | 1.225906000  | -0.136448000 |
| 94 | 3.664951000 | 0.390130000  | -0.723545000 |
| 6  | 3.577618000 | -0.301808000 | -3.234032000 |
| 1  | 3.540673000 | -0.594511000 | -4.296050000 |
| 8  | 3.395262000 | 0.897564000  | -2.865623000 |
| 8  | 3.827791000 | -1.142208000 | -2.320695000 |
| 9  | 3.774603000 | 2.835673000  | -1.020216000 |
| 1  | 3.042681000 | 3.360871000  | -0.785349000 |

**X (PuF) System**

|    |             |              |              |
|----|-------------|--------------|--------------|
| 6  | 1.422231000 | 0.481151000  | 0.602773000  |
| 1  | 0.494612000 | 0.612009000  | 1.182860000  |
| 6  | 5.920258000 | 0.278321000  | 0.499713000  |
| 1  | 6.895259000 | 0.320240000  | 1.011331000  |
| 8  | 2.141301000 | 1.468362000  | 0.257791000  |
| 8  | 1.832695000 | -0.660903000 | 0.241526000  |
| 8  | 5.153344000 | -0.724253000 | 0.596160000  |
| 8  | 5.501009000 | 1.235423000  | -0.221075000 |
| 94 | 3.632853000 | 0.184932000  | -0.738956000 |
| 6  | 3.546904000 | -0.382972000 | -3.277758000 |
| 1  | 3.495866000 | -0.617870000 | -4.353094000 |
| 8  | 3.380710000 | 0.797646000  | -2.841835000 |
| 8  | 3.774422000 | -1.272207000 | -2.406015000 |
